# Supplementary material
Source: publisher figshare collection journal article supplement (https://acs.figshare.com/ndownloader/files/9355339)
Supplement: Supplementary file 1 [file 9355339]

# Supporting information

## Iron(II) Bis-CNN Pincer Complex Catalyzed Cyclic Carbonate Synthesis at Room Temperature

Fei Chen, Ning Liu\*, Bin Dai\*

School of Chemistry and Chemical Engineering, Key Laboratory for Green Processing of  
Chemical Engineering of Xinjiang Bingtuan, Shihezi University, North 4th Road, Shihezi,  
Xinjiang 832003, China, E-mail: ninglau@163.com; ningliu@shzu.edu.cn; dbinly@126.com

Totals - 37 pages, and 64 figures

|                                                                                                           |         |
|-----------------------------------------------------------------------------------------------------------|---------|
| 1. X-Ray Data of iron complex <b>1i</b> .....                                                             | S2      |
| 2. H NMR spectra of the recycled catalyst.....                                                            | S3      |
| 3. NMR Spectra for the Iron Complexes <b>1a-1k</b> .....                                                  | S4-S16  |
| 4. NMR Spectra for the Cycloaddition Products.....                                                        | S17-S32 |
| 5. HPLC Spectra for ( <i>S</i> )- <b>2n</b> , ( <i>S</i> )- <b>2g</b> , and ( <i>R</i> )- <b>2g</b> ..... | S33-S37 |

## 1. X-Ray Data of iron complex 1i

CCDC 1511481 (**1i**) contains the supplementary crystallographic data for this paper. The data can be obtained free of charge from The Cambridge Crystallographic Data Centre via <https://www.ccdc.cam.ac.uk/>

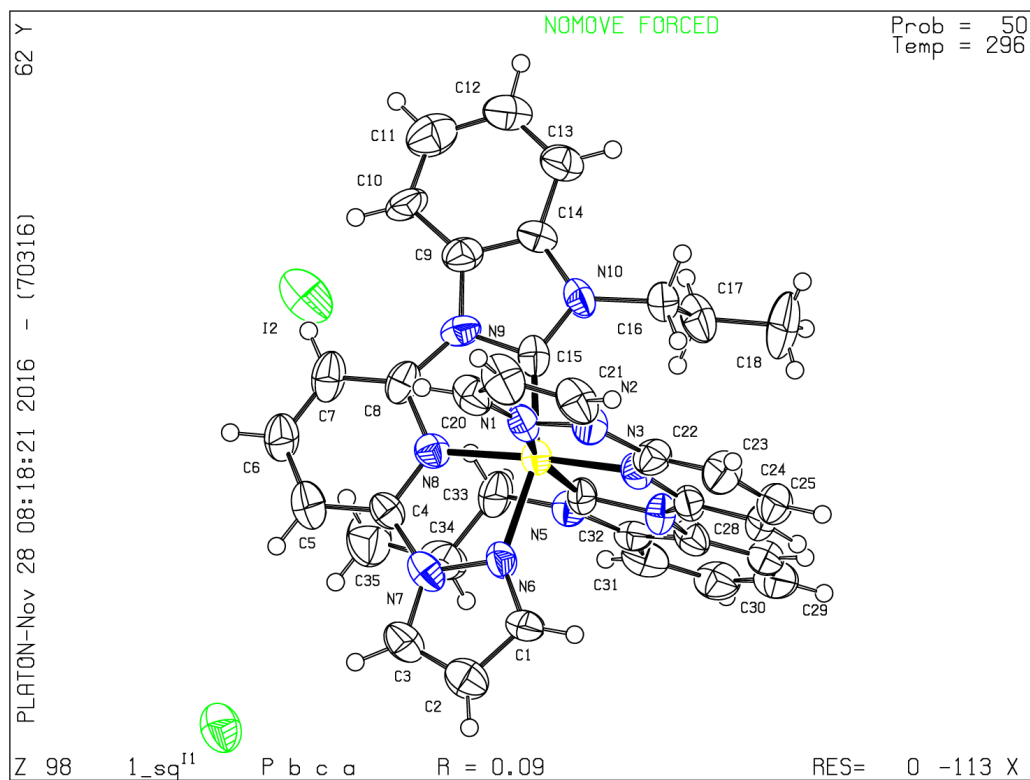

**Figure S1.** Thermal ellipsoid plots of **1i**.

cf-181

cf-125

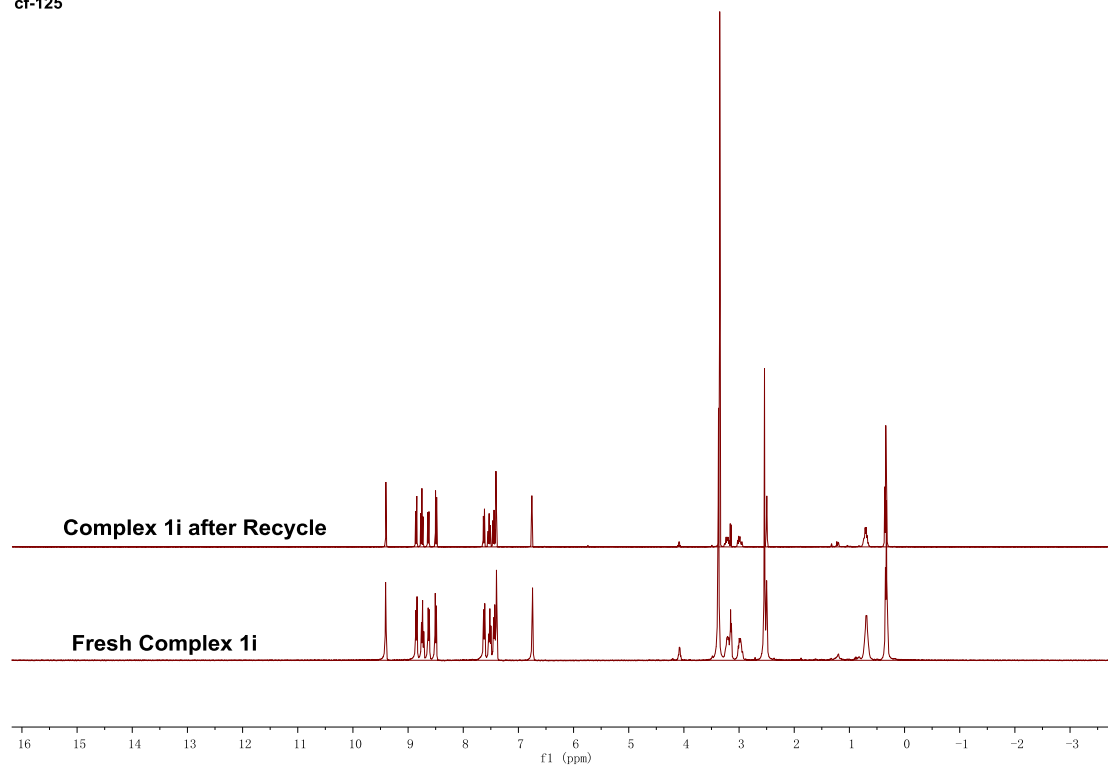

**Figure S2.**  $^1\text{H}$  NMR(400 MHz,  $\text{DMSO}-d_6$ ) spectra of the fresh and recycled catalyst **1i**.

## 2. NMR Spectra for the Iron Complexes

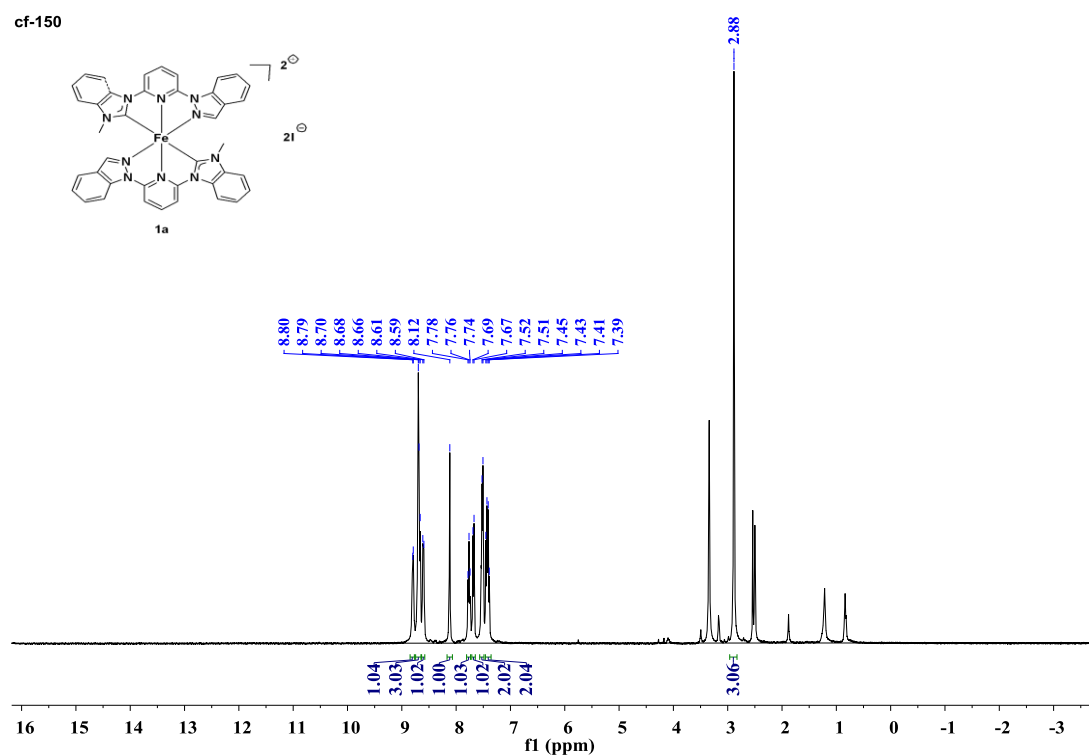

**Figure S3.** <sup>1</sup>H NMR spectra of Fe complex **1a**.

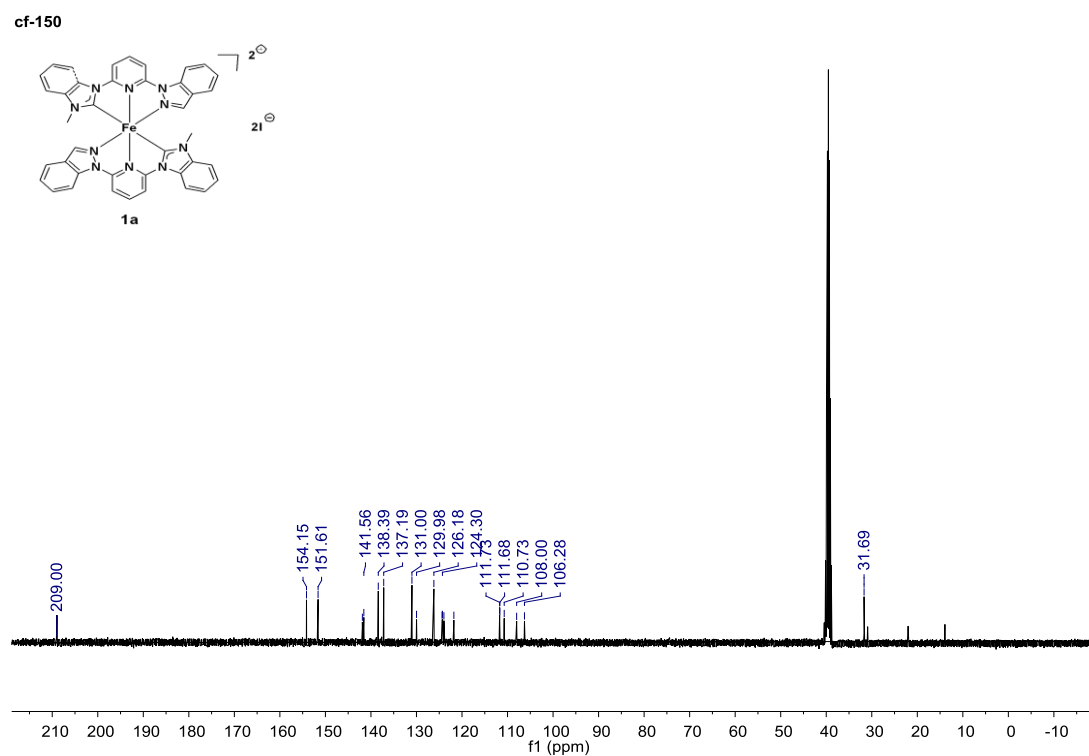

**Figure S4.** <sup>13</sup>C NMR spectra of Fe complex **1a**.

cf-162

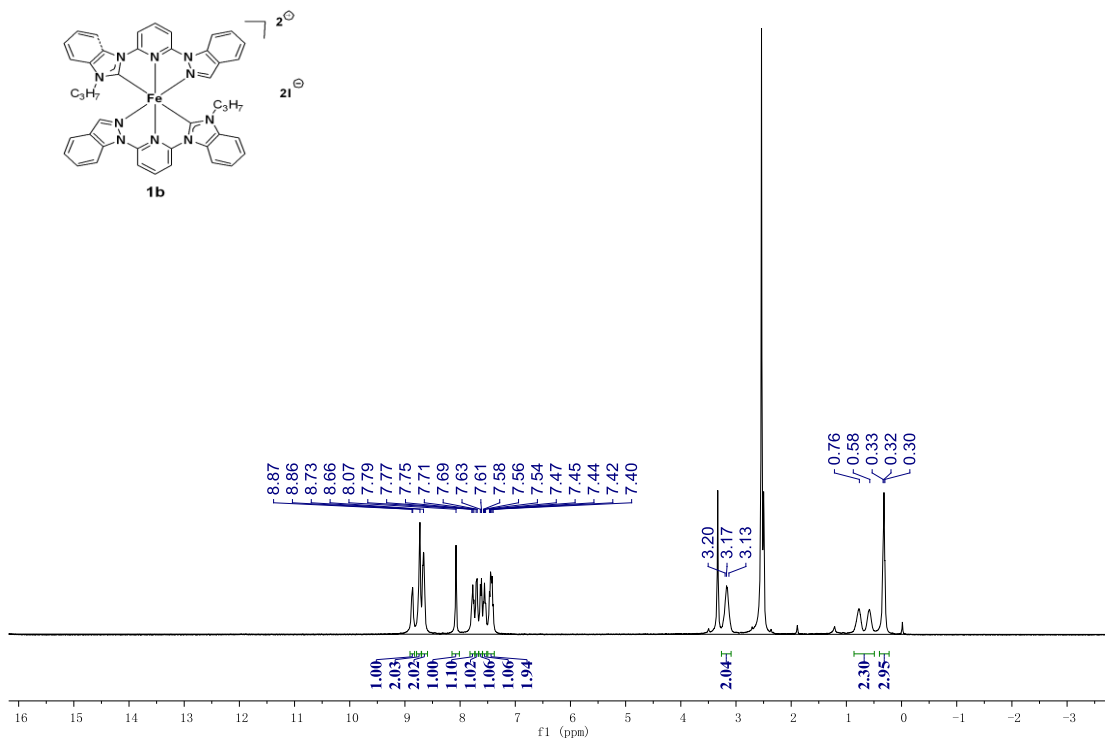

**Figure S5.**  $^1\text{H}$  NMR spectra of Fe complex **1b**.

cf-162

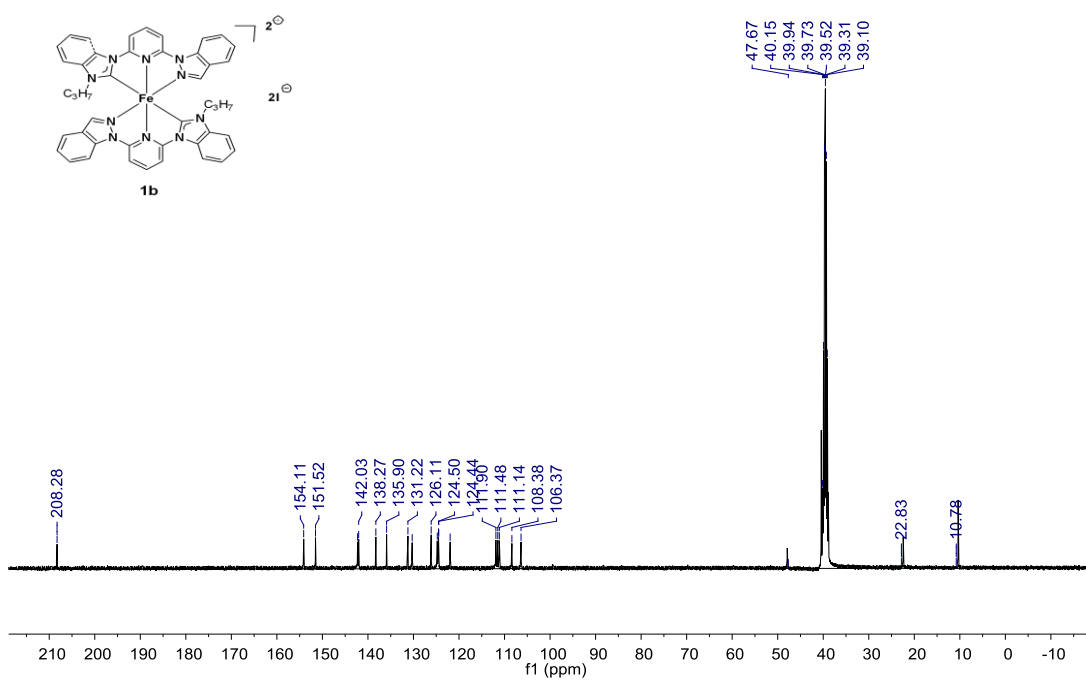

**Figure S6.**  $^{13}\text{C}$  NMR spectra of Fe complex **1b**.

cf-148

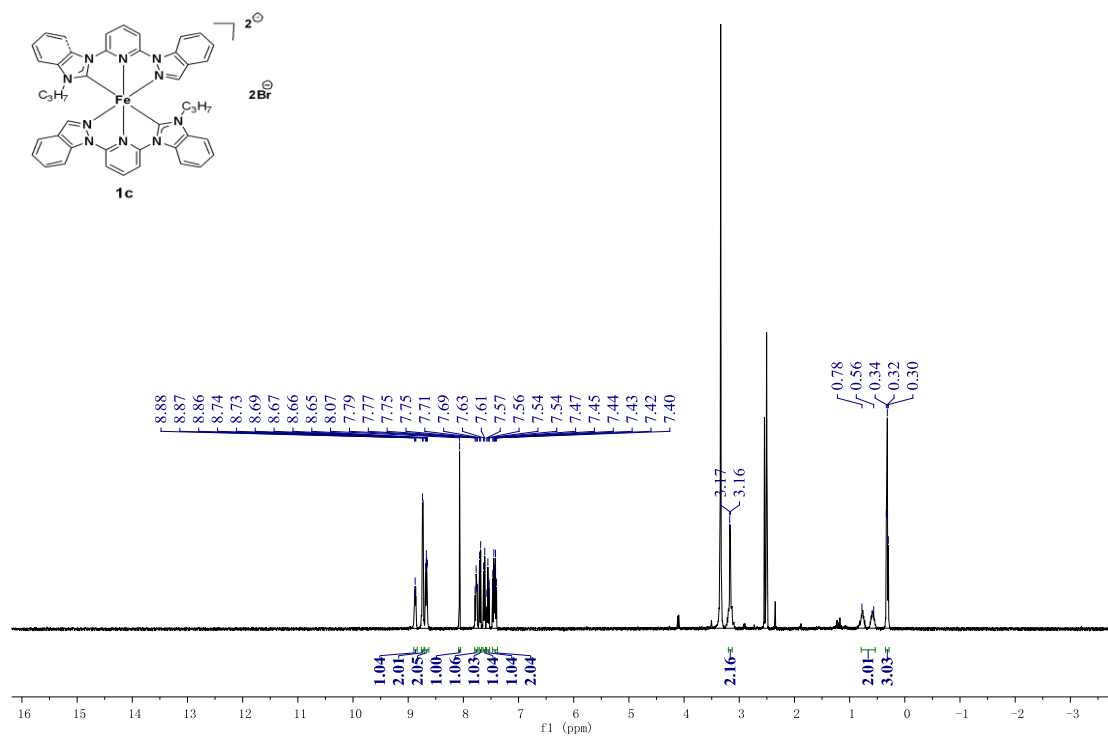

**Figure S7.** <sup>1</sup>H NMR spectra of Fe complex **1c**.

cf-148

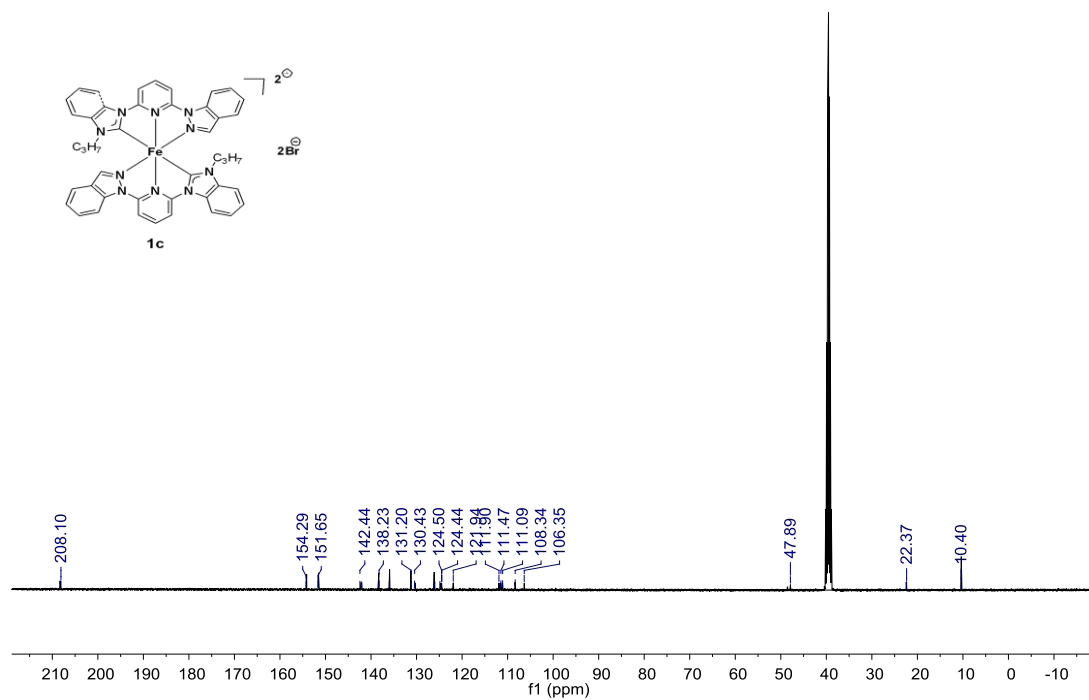

**Figure S8.** <sup>13</sup>C NMR spectra of Fe complex **1c**.

**1d**

$2\text{Cl}^-$

$2\text{Cl}^-$

$\text{C}_3\text{H}_7$

$\text{C}_3\text{H}_7$

8.95, 8.93, 8.81, 8.79, 8.75, 8.73, 8.71, 8.69, 8.08, 7.77, 7.75, 7.73, 7.69, 7.67, 7.64, 7.62, 7.55, 7.54, 7.52, 7.45, 7.43, 7.42, 7.41, 7.40, 7.38

0.82, 0.76, 0.71, 0.61, 0.57, 0.52, 0.32, 0.30, 0.28

3.23, 3.16, 3.11

2.31

1.09, 1.12, 3.00, 1.11, 1.23, 1.17, 1.09, 1.09, 2.15

1.38, 1.22, 3.26

f1 (ppm)

cf-161

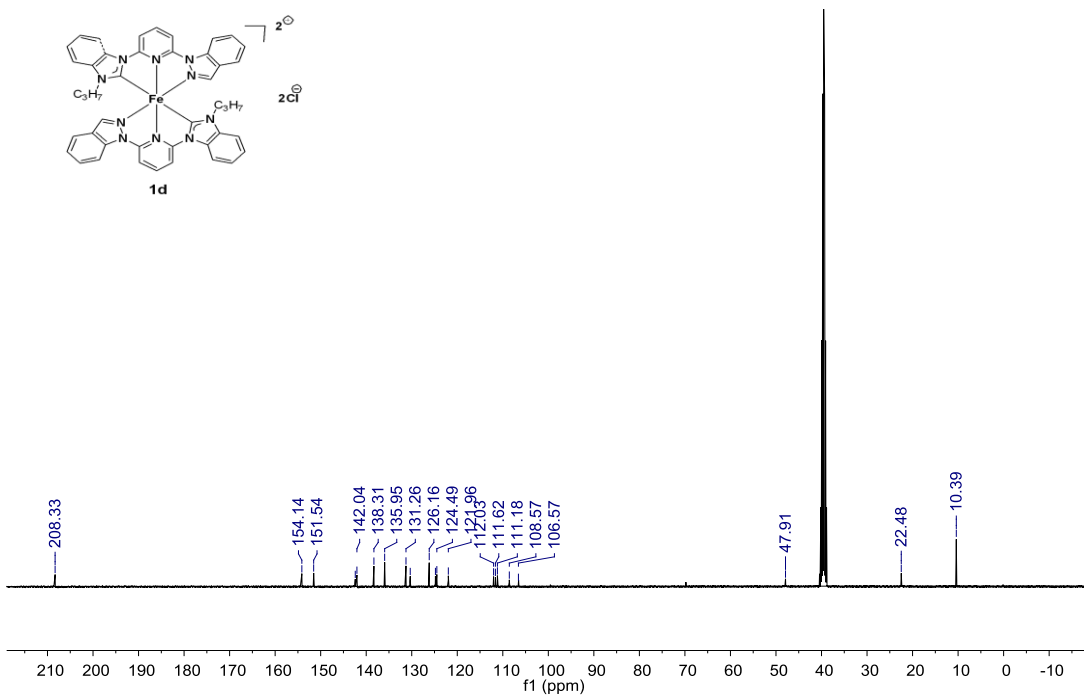

S7

cf-167

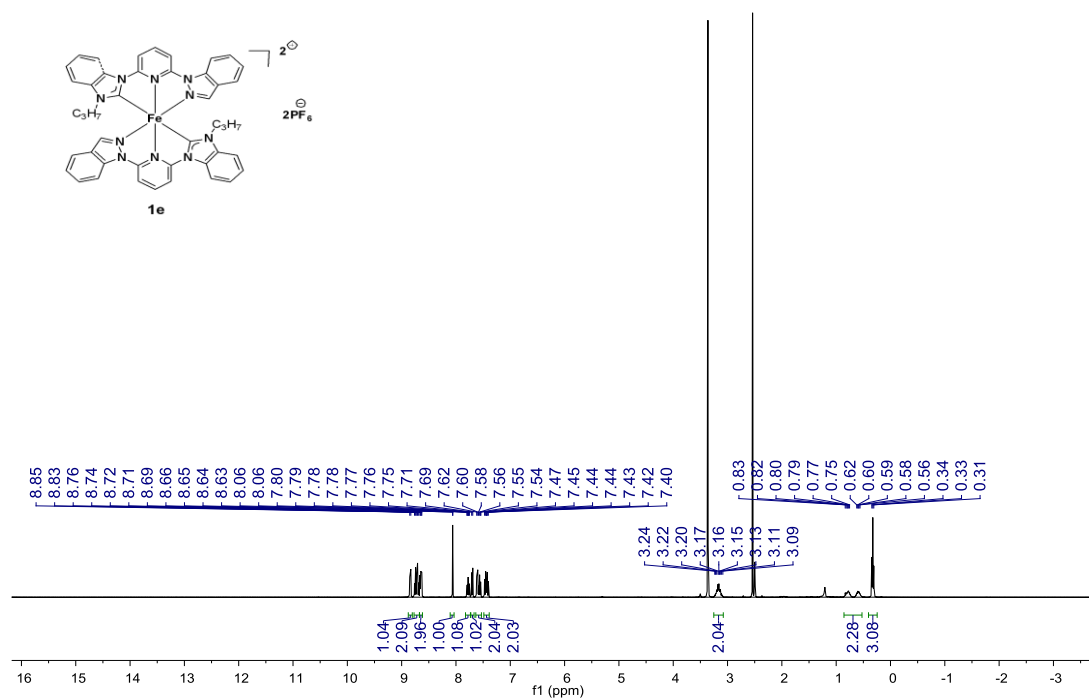

**Figure S11.**  $^1\text{H}$  NMR spectra of Fe complex **1e**.

cf-167

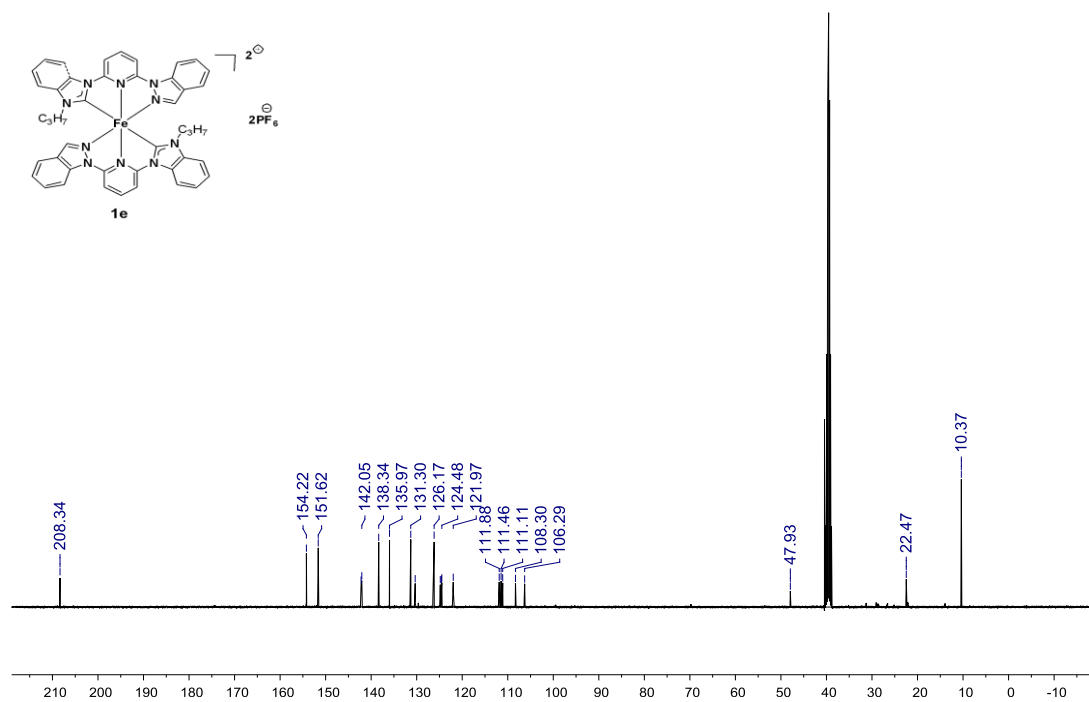

**Figure S12.**  $^{13}\text{C}$  NMR spectra of Fe complex **1e**.



cf-167

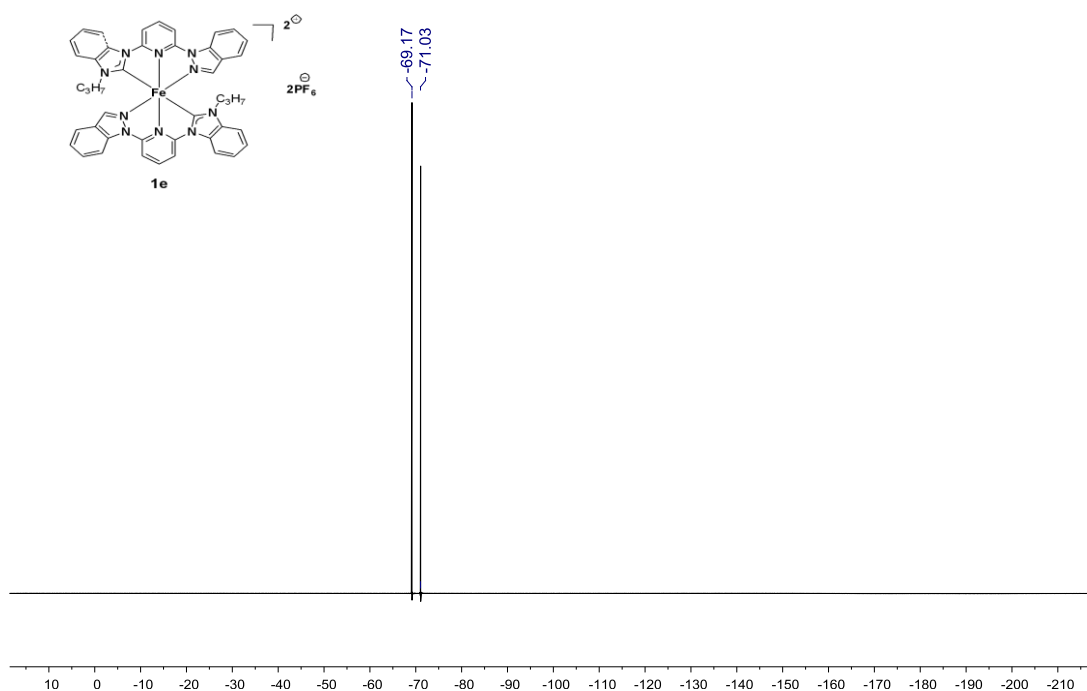

**Figure S13.**  $^{19}\text{F}$  NMR spectra of Fe complex **1e**.

cf-163

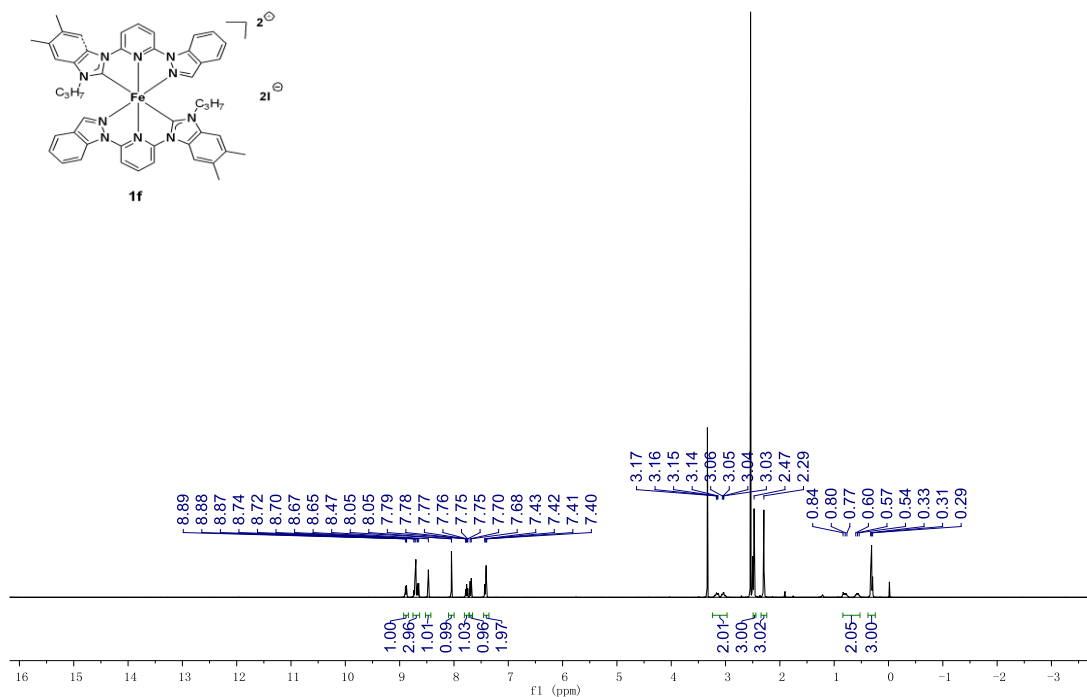

**Figure S14.**  $^1\text{H}$  NMR spectra of Fe complex **1f**.

cf-163

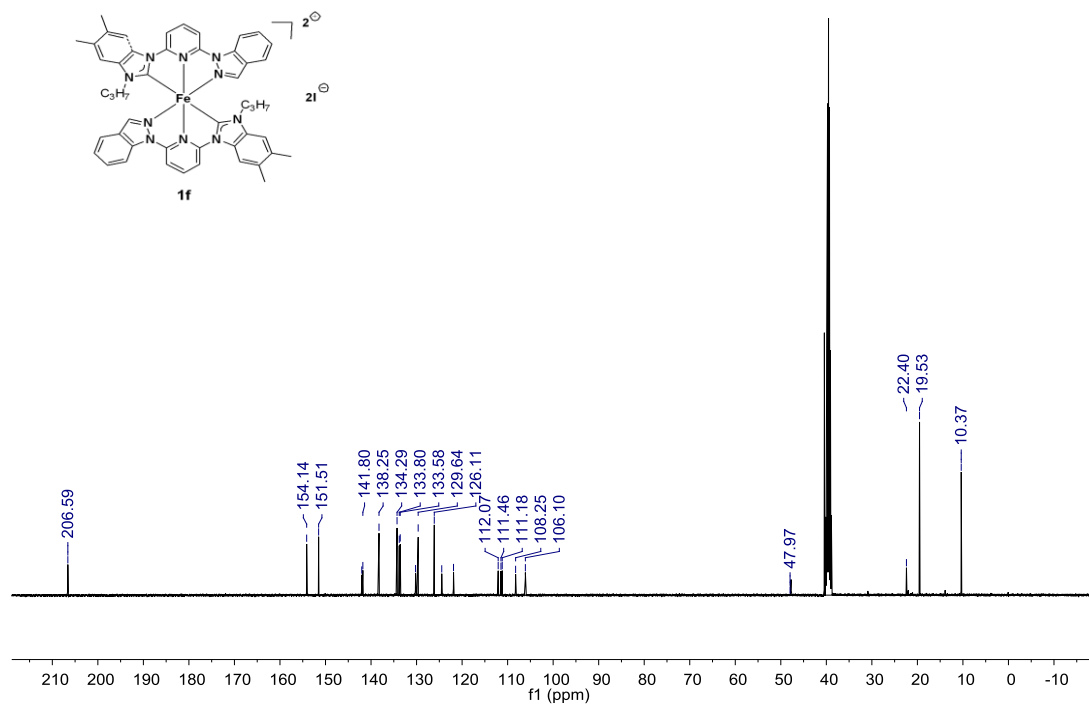

**Figure S15.**  $^{13}\text{C}$  NMR spectra of Fe complex **1f**.

cf-129

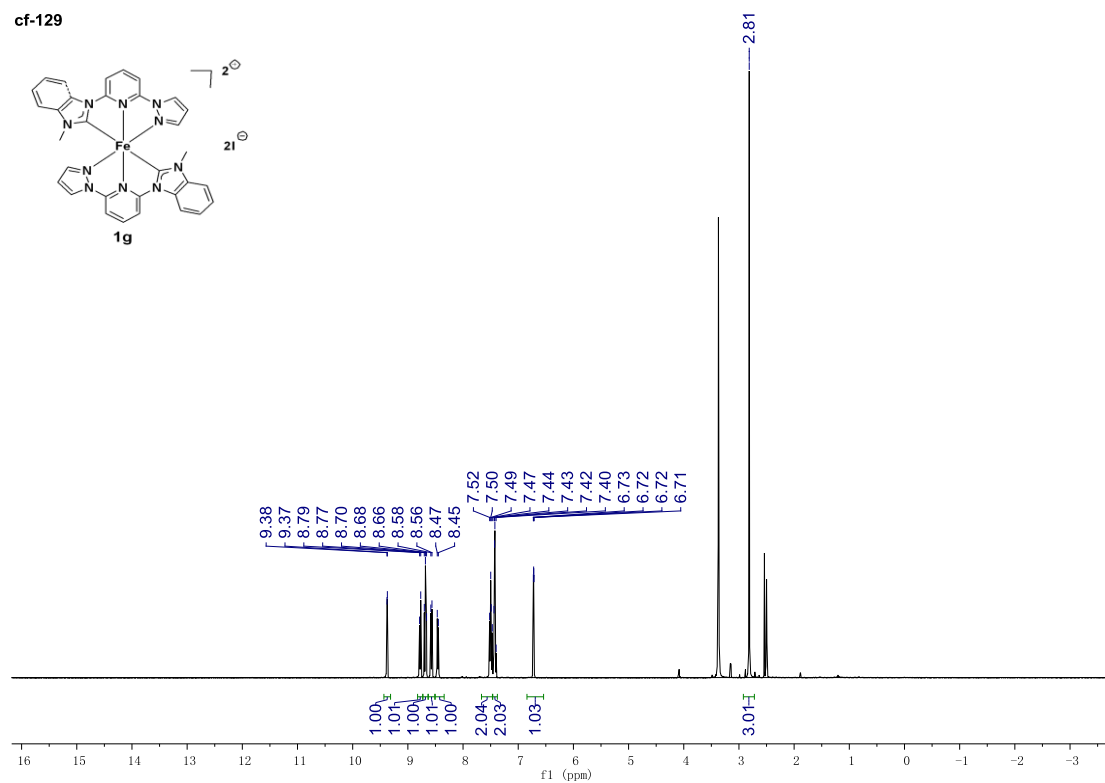

**Figure S16.**  $^1\text{H}$  NMR spectra of Fe complex **1g**.

cf-129/2

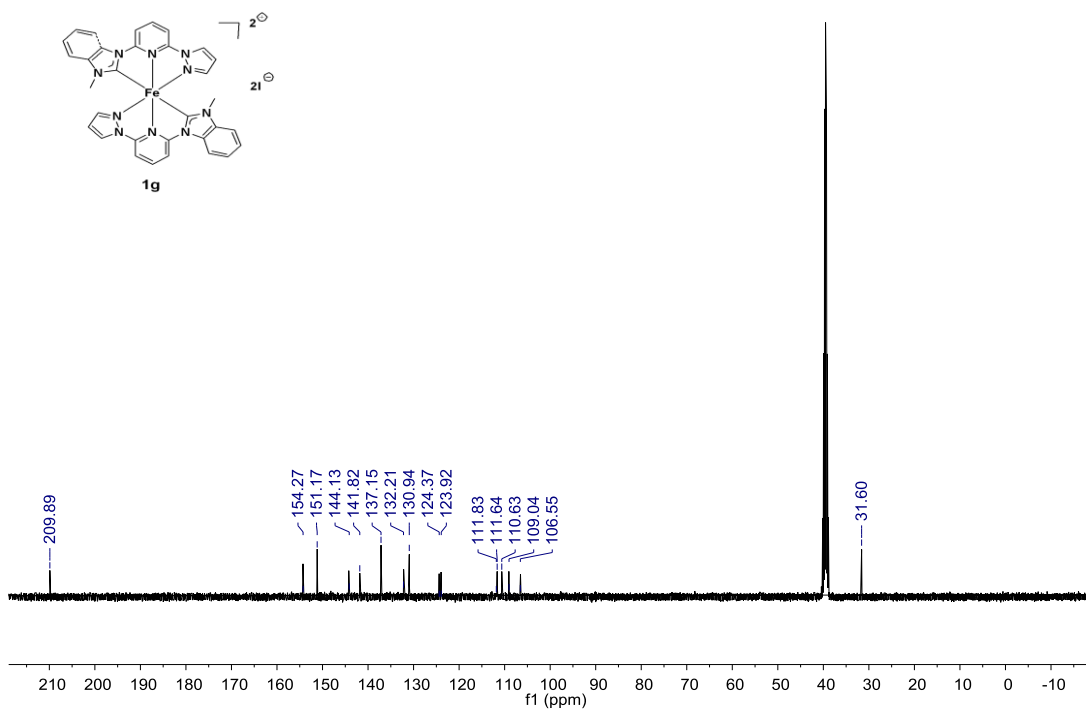

**Figure S17.**  $^{13}\text{C}$  NMR spectra of Fe complex **1g**.

cf-169

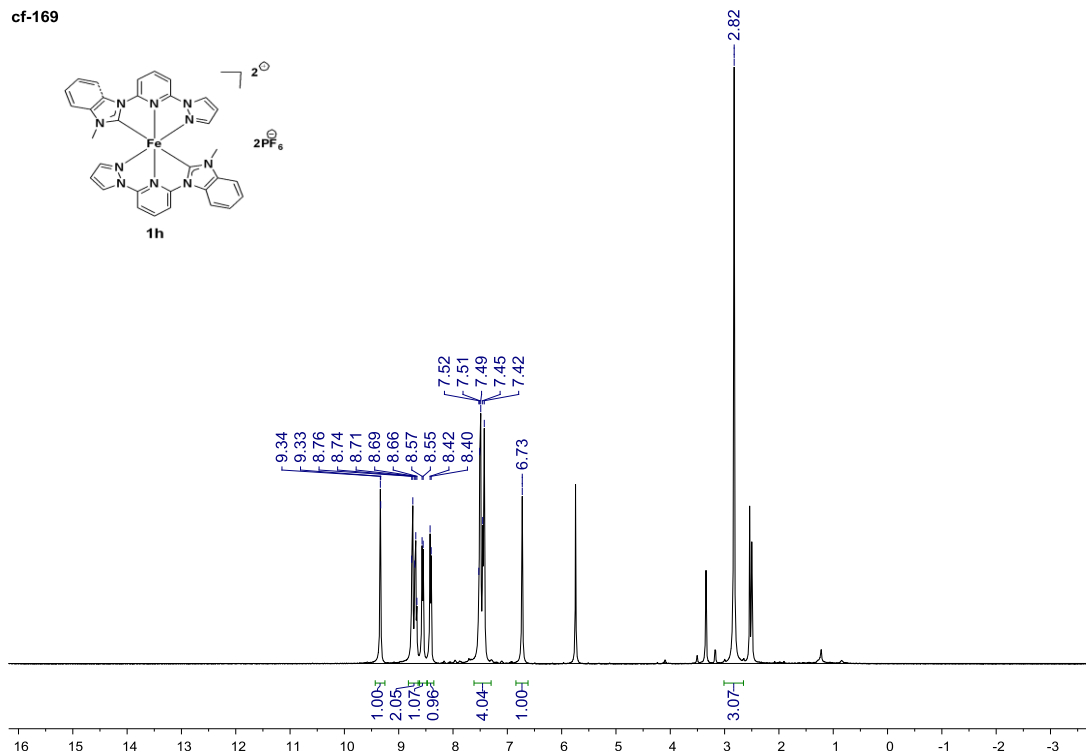

**Figure S18.**  $^1\text{H}$  NMR spectra of Fe complex **1h**.

cf-169

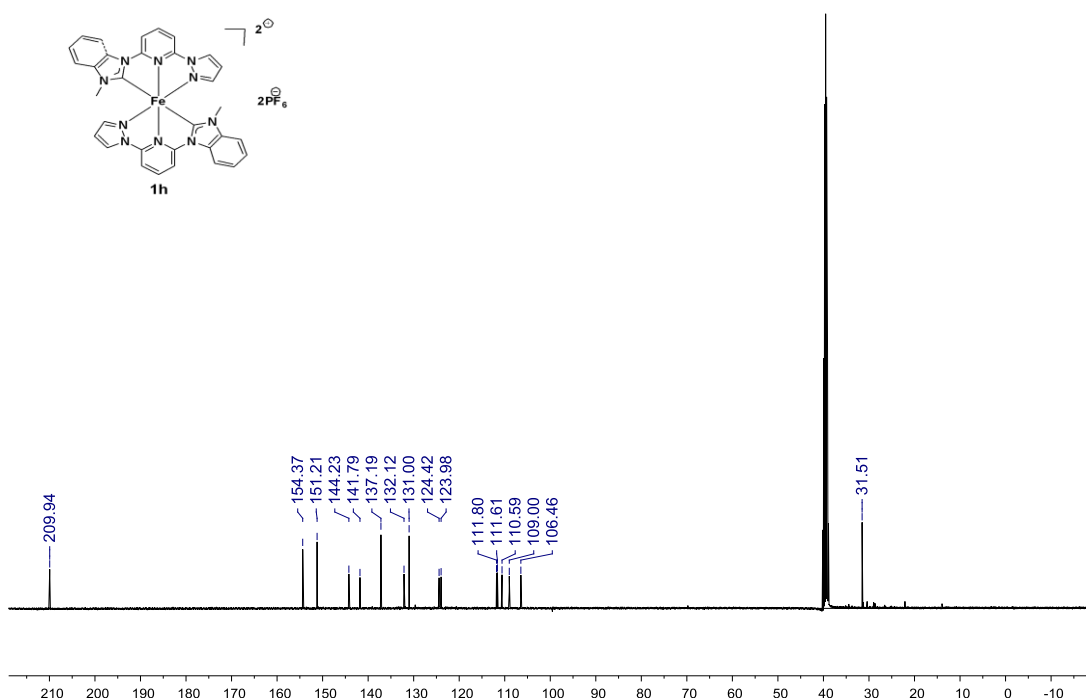

cf-169

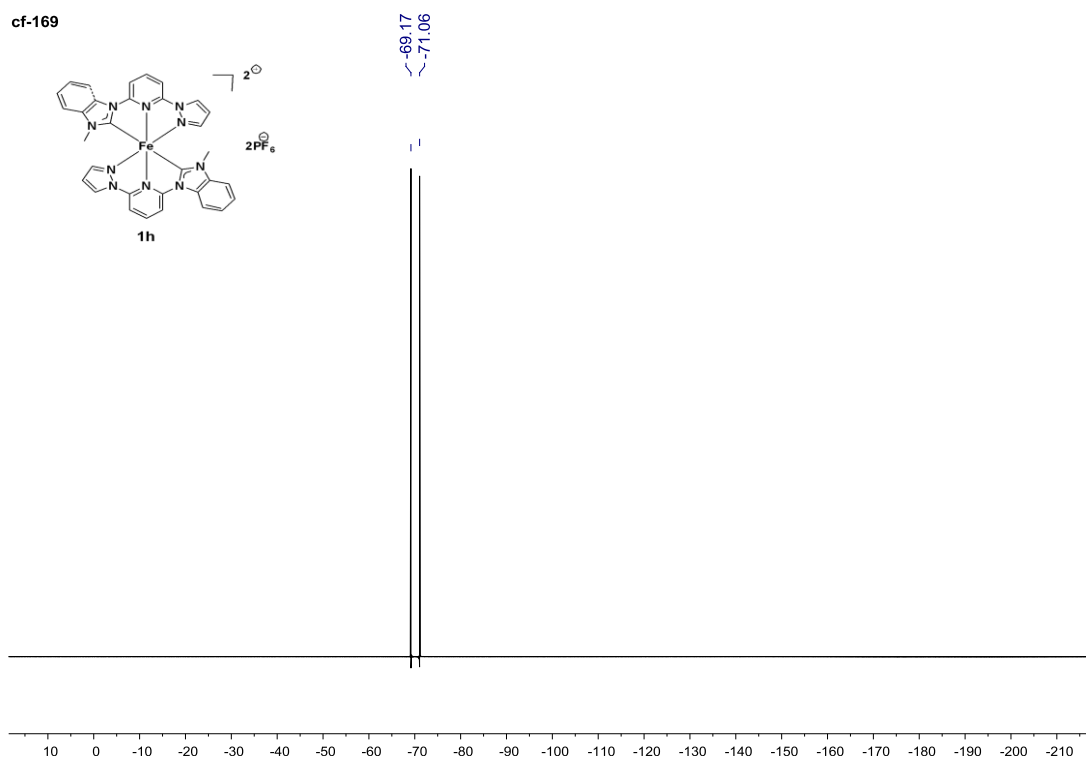

cf-125/1

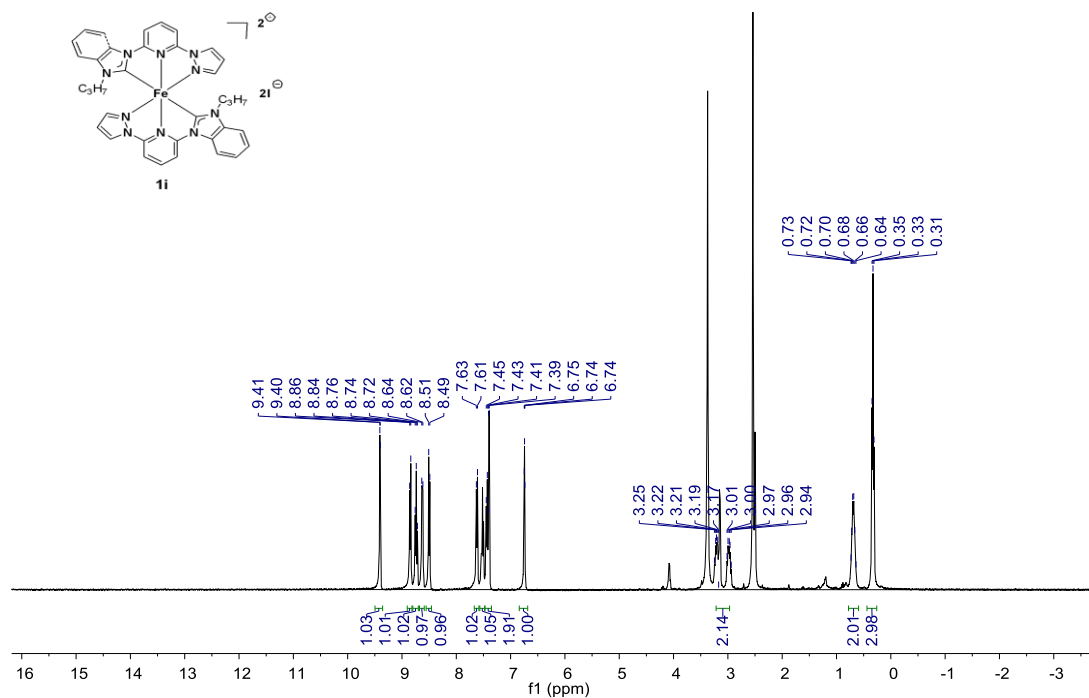

**Figure S21.** <sup>1</sup>H NMR spectra of Fe complex **1i**.

cf-145/2

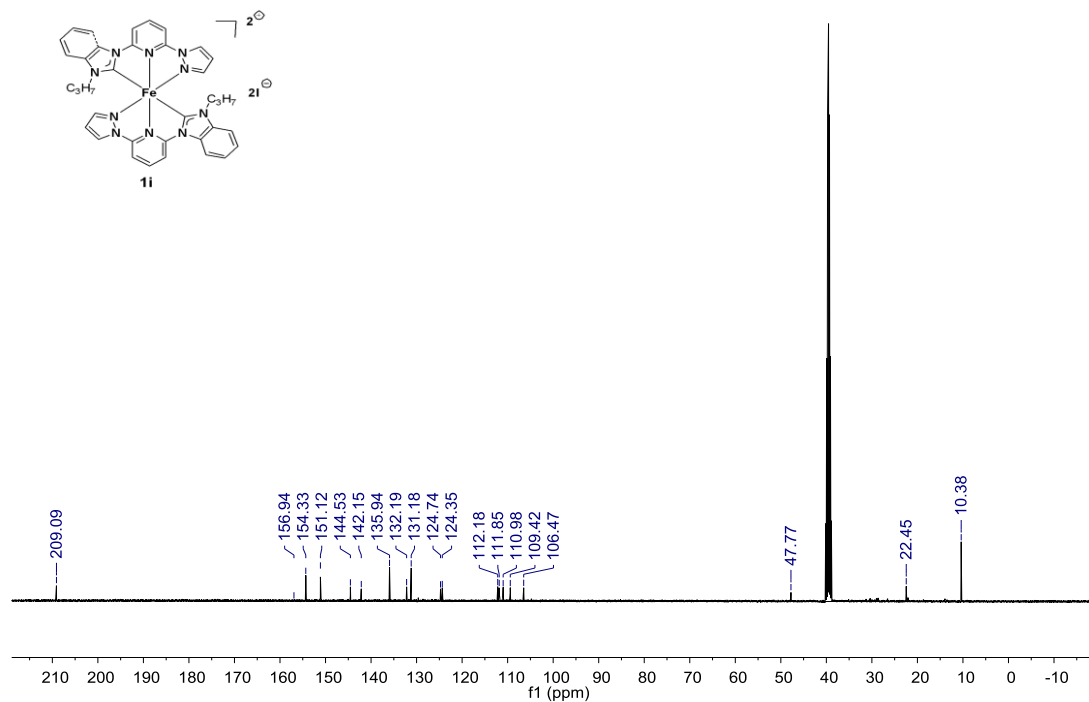

**Figure S22.** <sup>13</sup>C NMR spectra of Fe complex **1i**.

cf-155

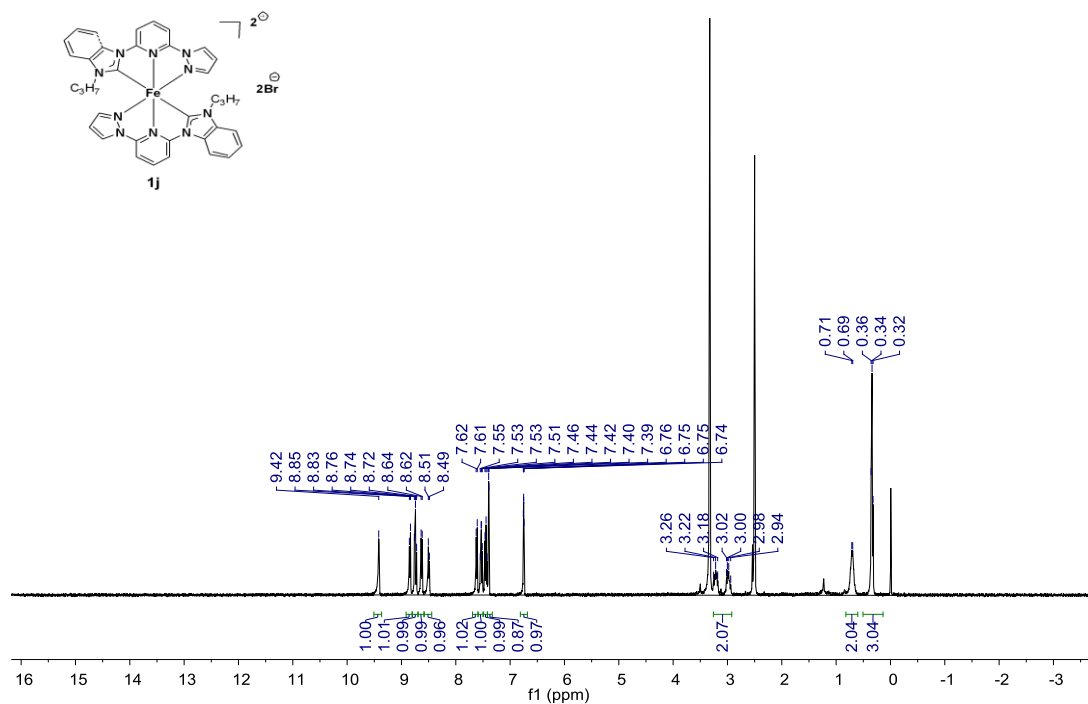

**Figure S23.** <sup>1</sup>H NMR spectra of Fe complex **1j**.

cf-155

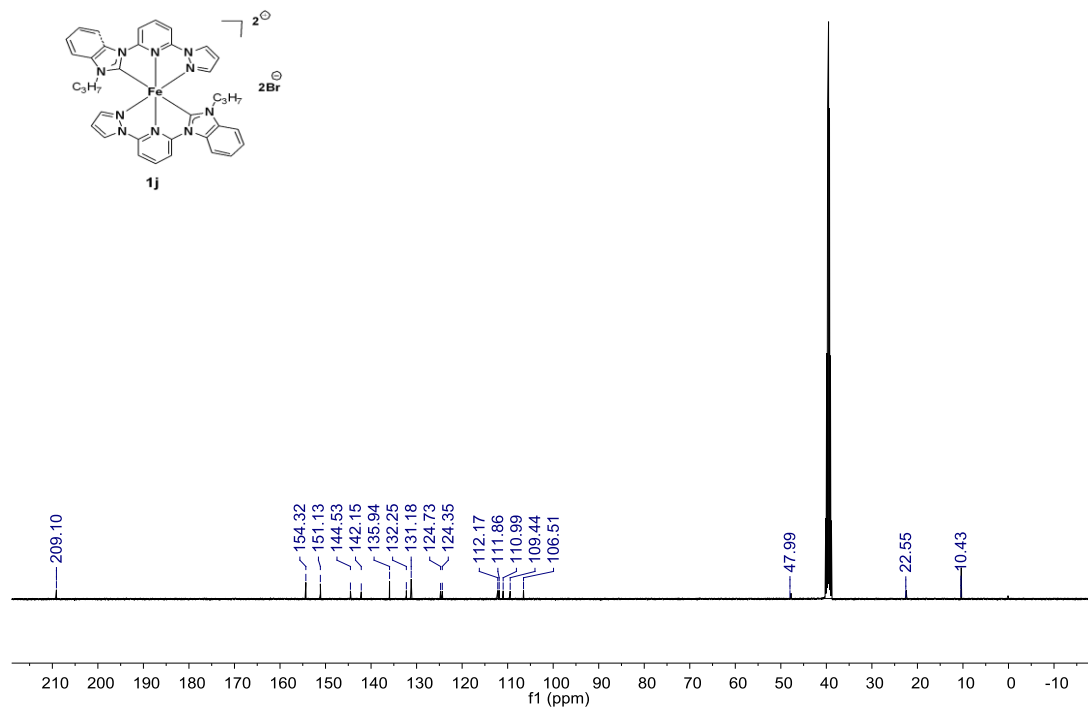

**Figure S24.** <sup>13</sup>C NMR spectra of Fe complex **1j**.

cf-164

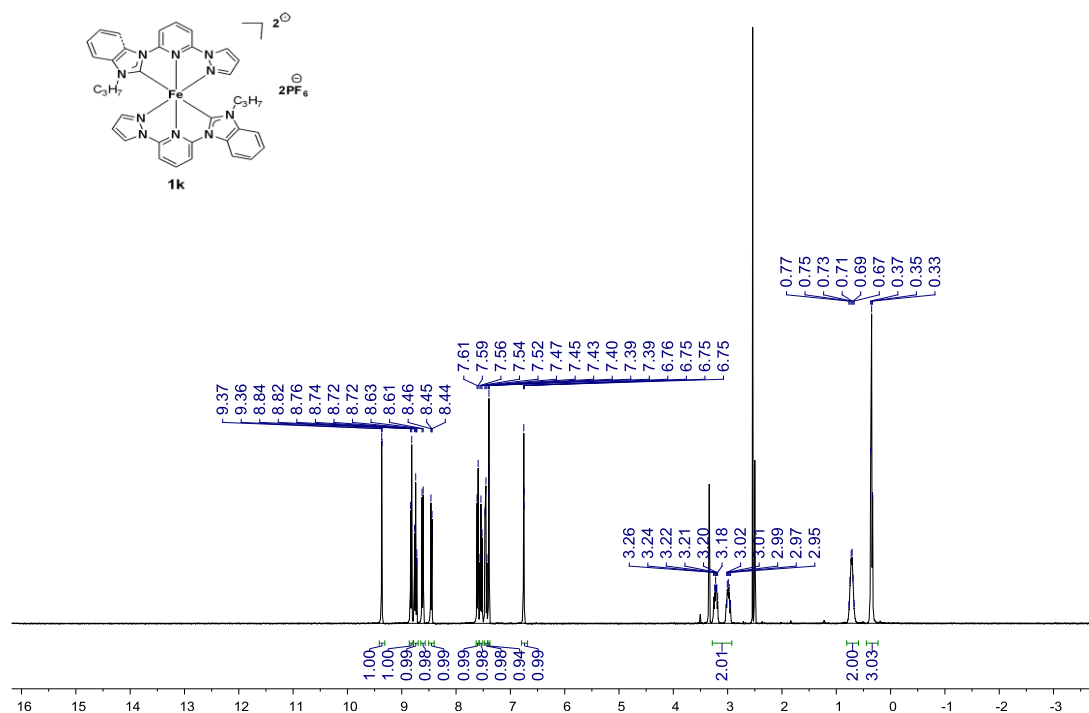

**Figure S25.**  $^1\text{H}$  NMR spectra of Fe complex **1k**.

cf-164

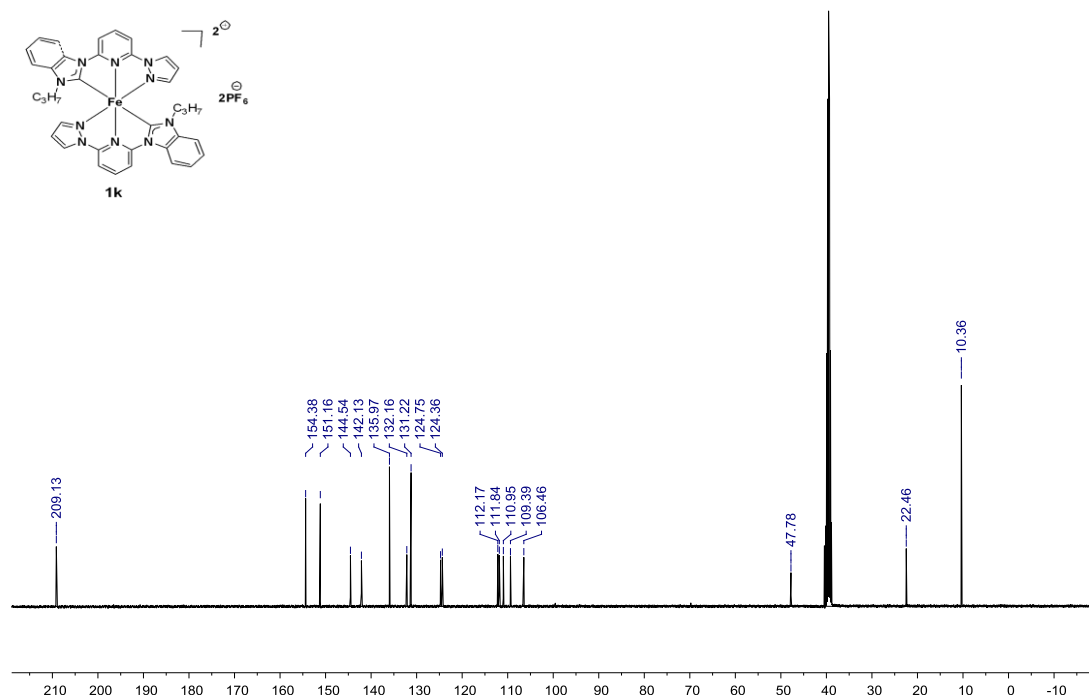

**Figure S26.**  $^{13}\text{C}$  NMR spectra of Fe complex **1k**.

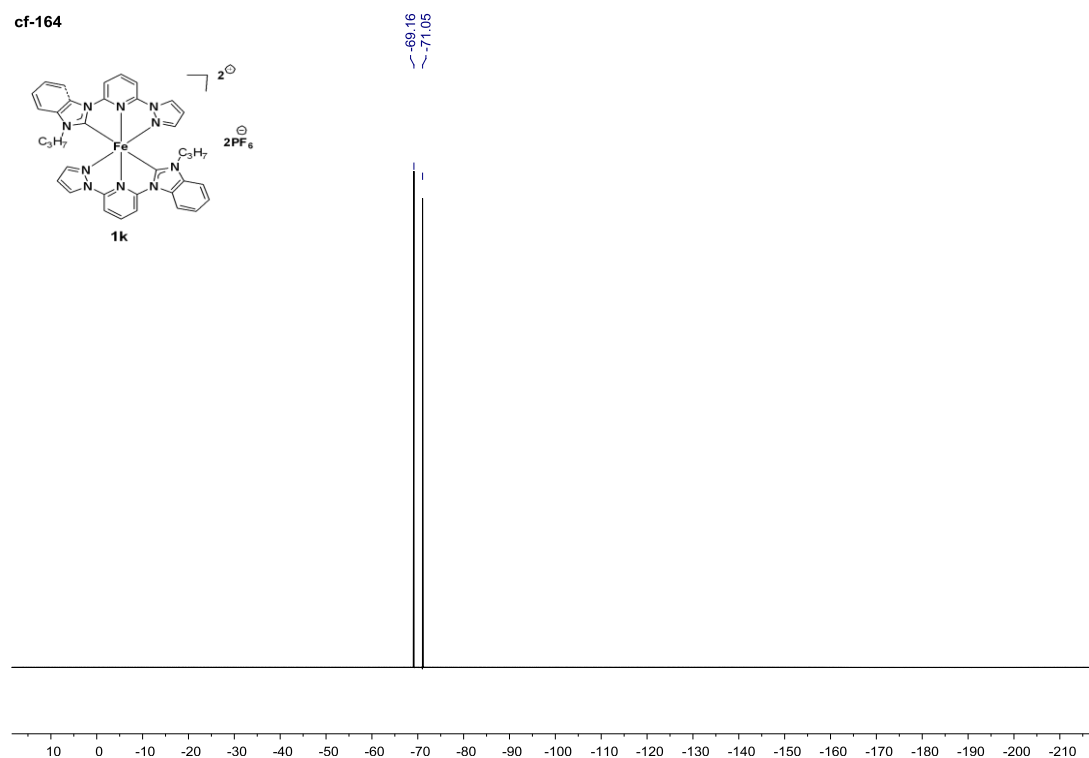

**Figure S27.** <sup>19</sup>F NMR spectra of Fe complex **1k**.



### 3. NMR Spectra for the Cycloaddition Products

cf-12

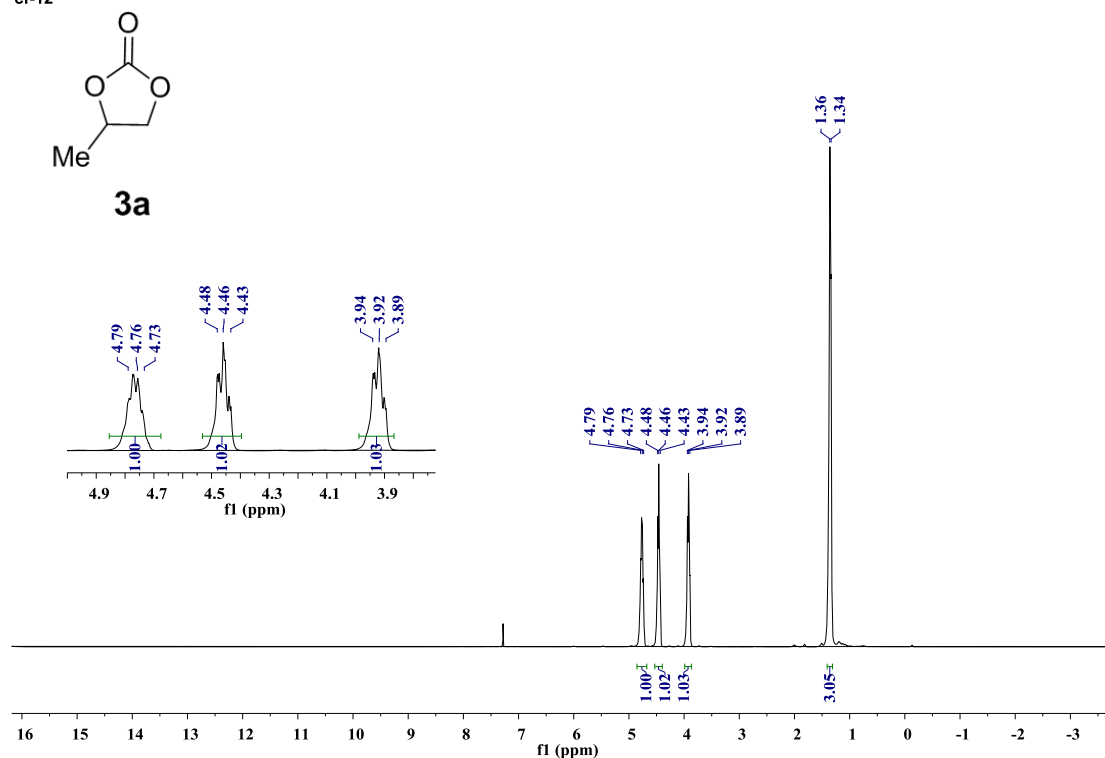

**Figure S28.**  $^1\text{H}$  NMR spectra of cyclic carbonate **3a**.

cf-12

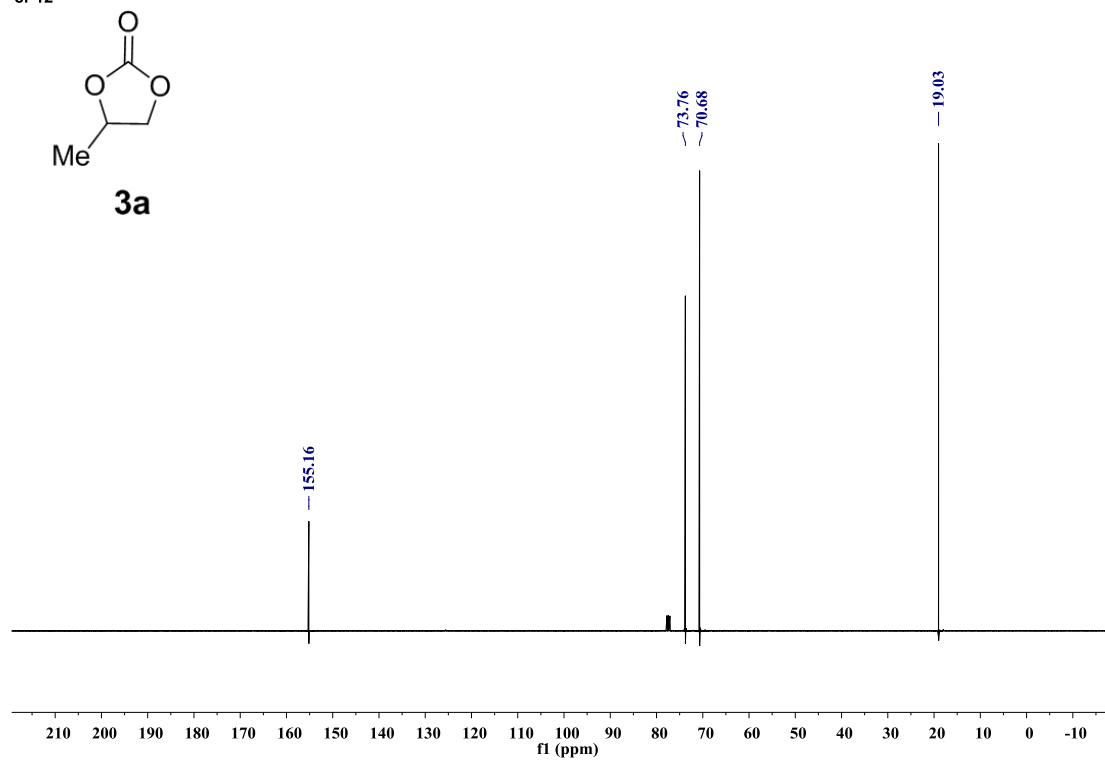

**Figure S29.**  $^{13}\text{C}$  NMR spectra of cyclic carbonate **3a**.

cf-109

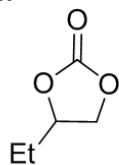**3b**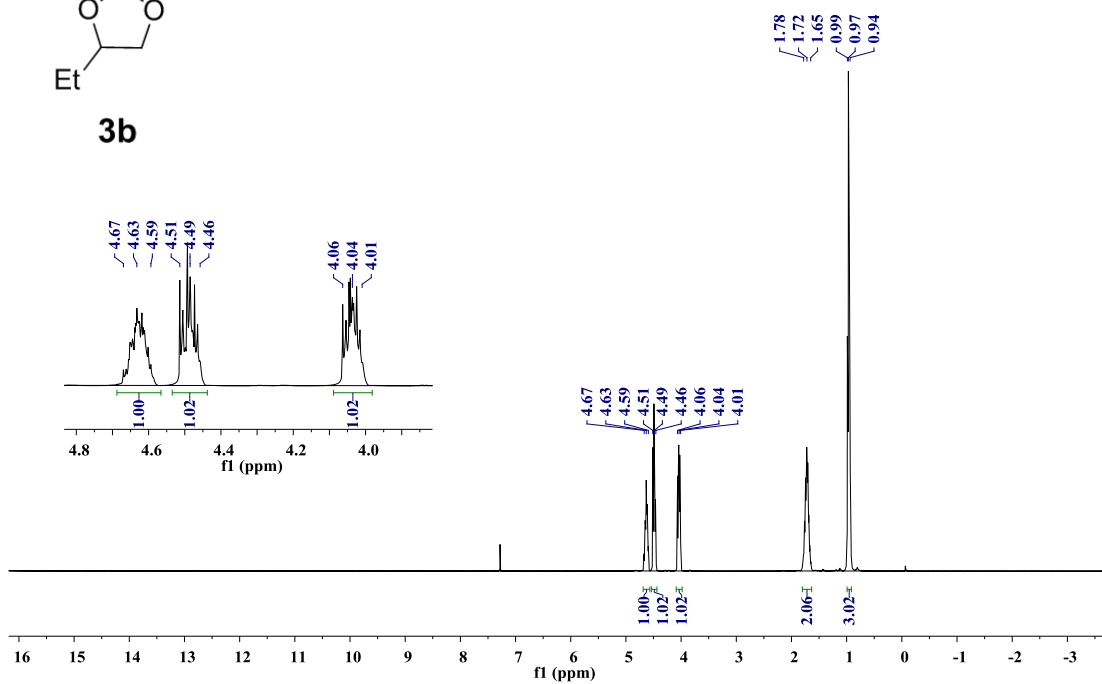**Figure S30.** <sup>1</sup>H NMR spectra of cyclic carbonate **3b**.

cf-109

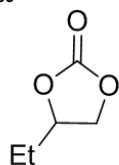**3b**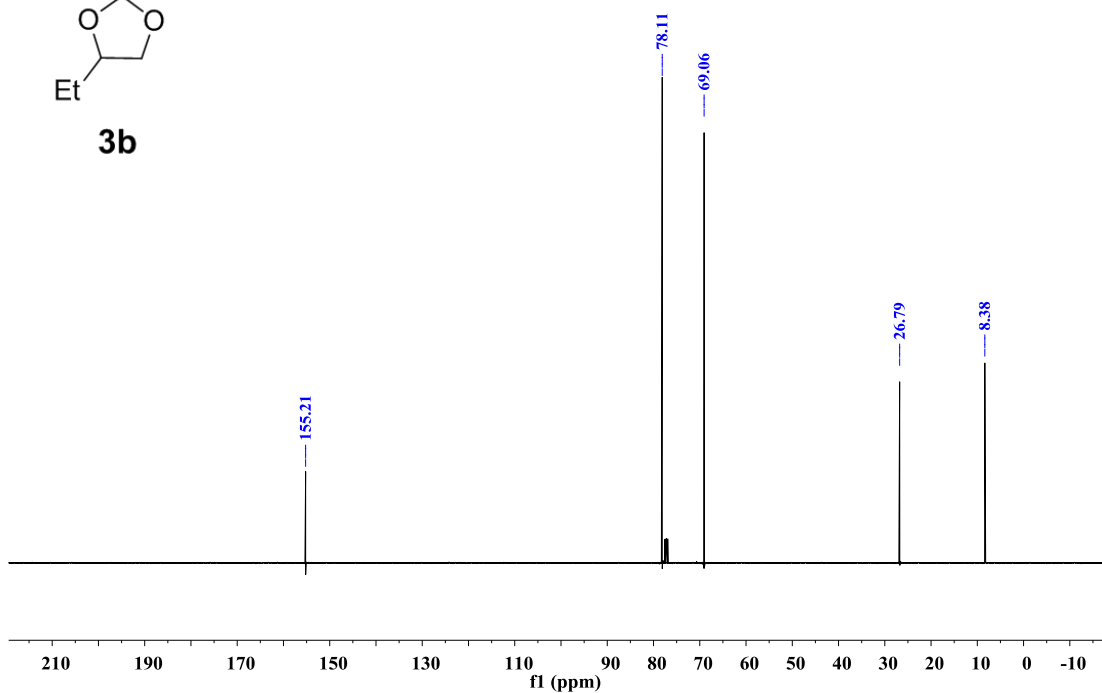**Figure S31.** <sup>13</sup>C NMR spectra of cyclic carbonate **3b**.

cf-29

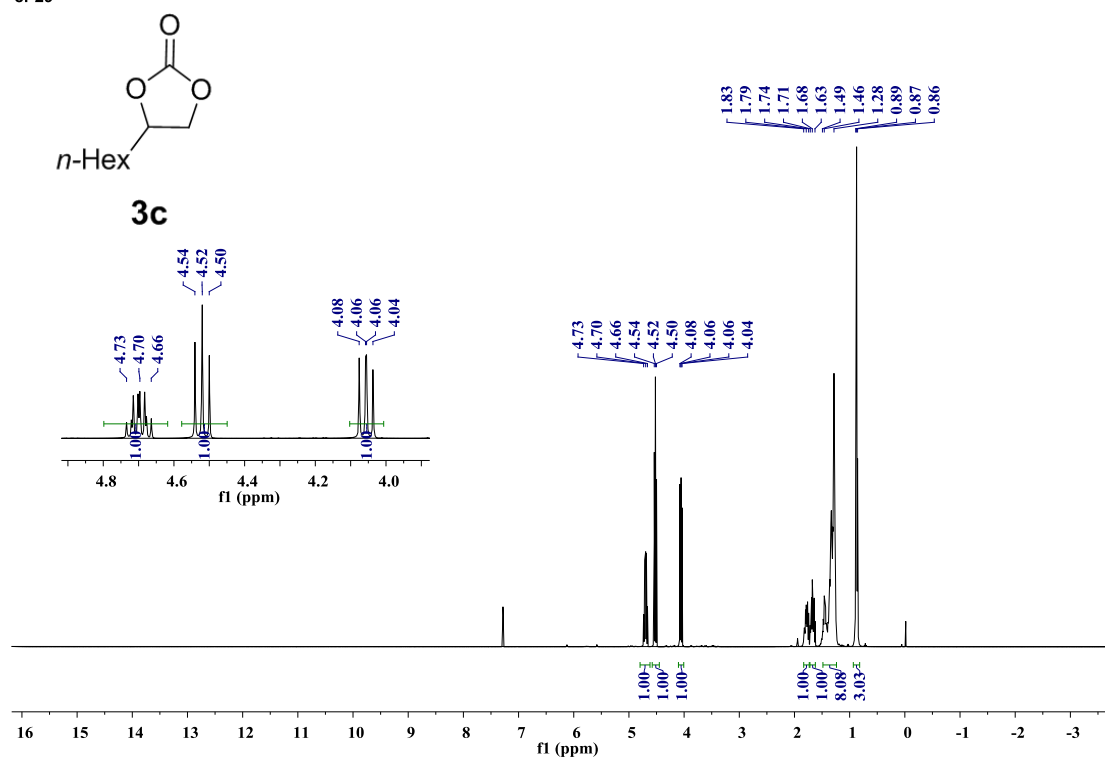Figure S32. <sup>1</sup>H NMR spectra of cyclic carbonate **3c**.

cf-29

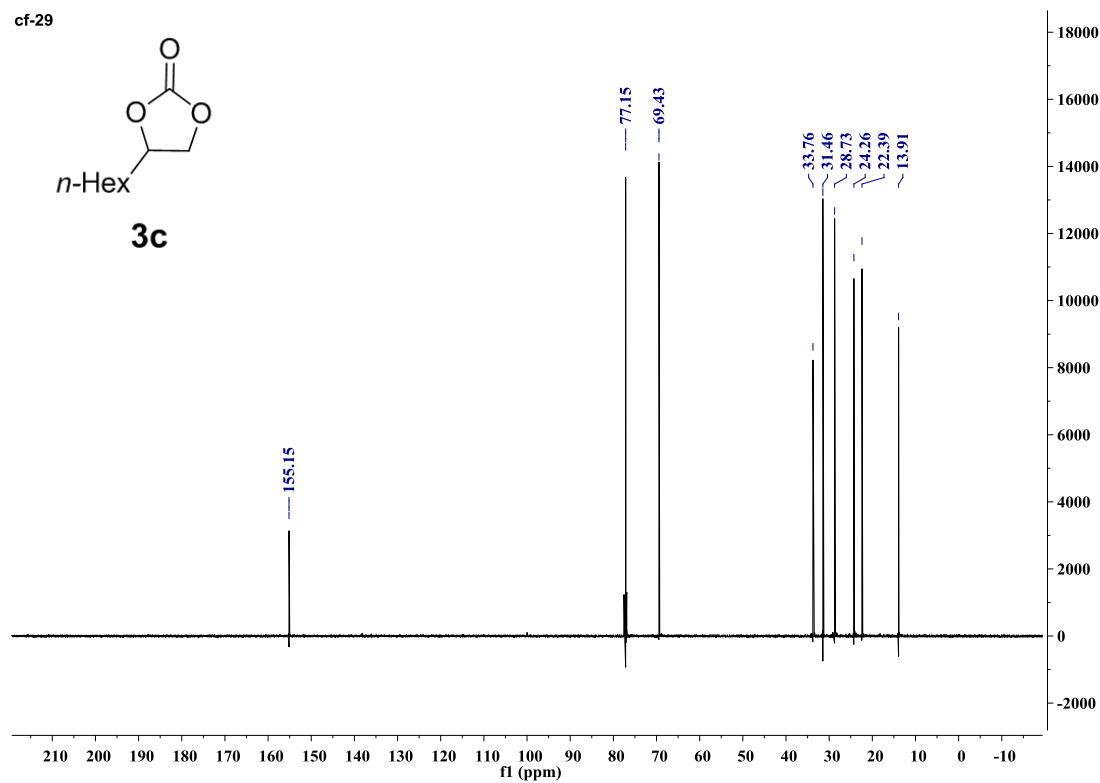Figure S33. <sup>13</sup>C NMR spectra of cyclic carbonate **3c**.

cf-176

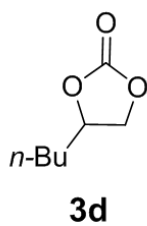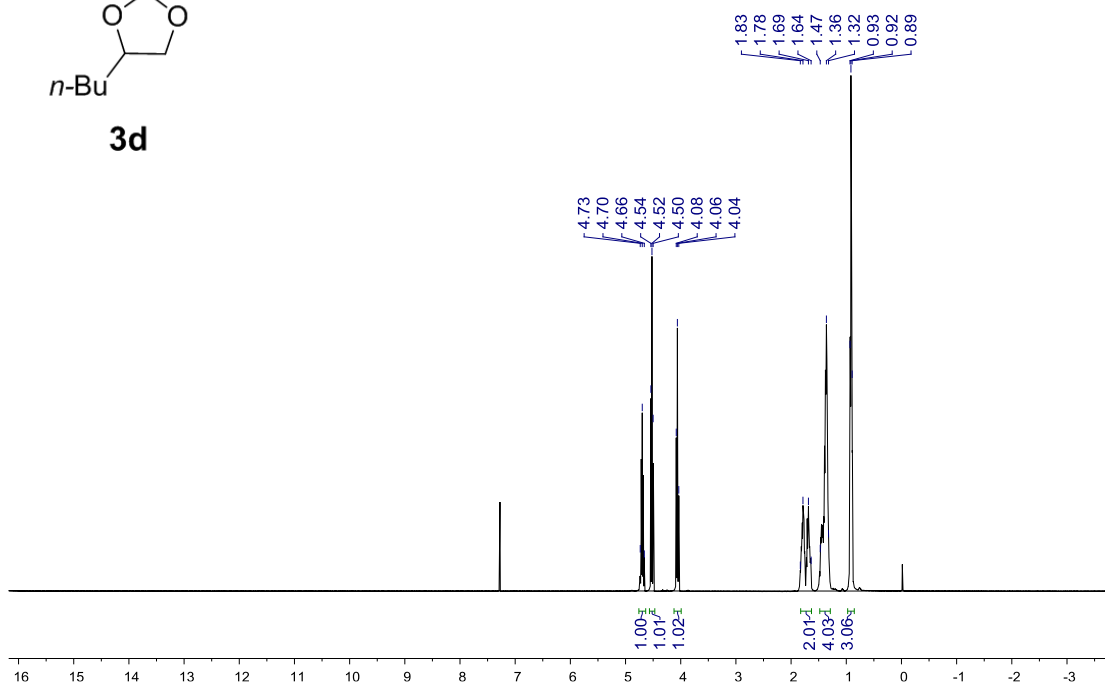

**Figure S34.** <sup>1</sup>H NMR spectra of cyclic carbonate **3d**.

cf-176

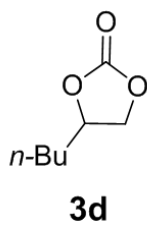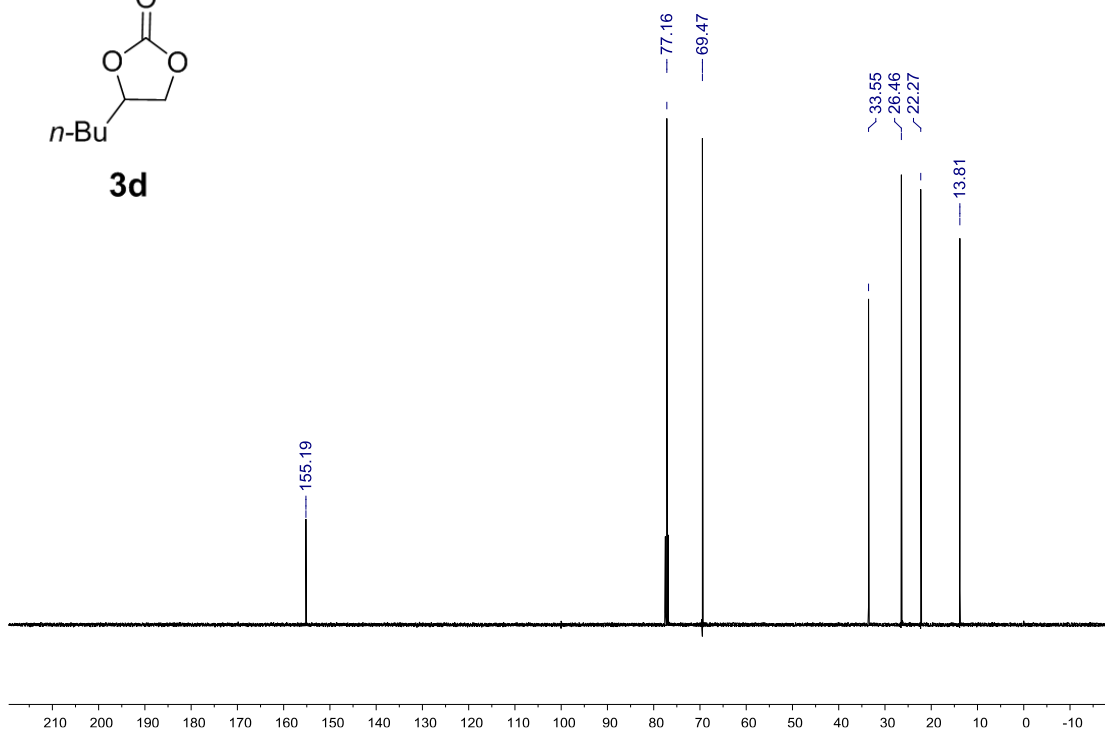

**Figure S35.** <sup>13</sup>C NMR spectra of cyclic carbonate **3d**.

cf-27

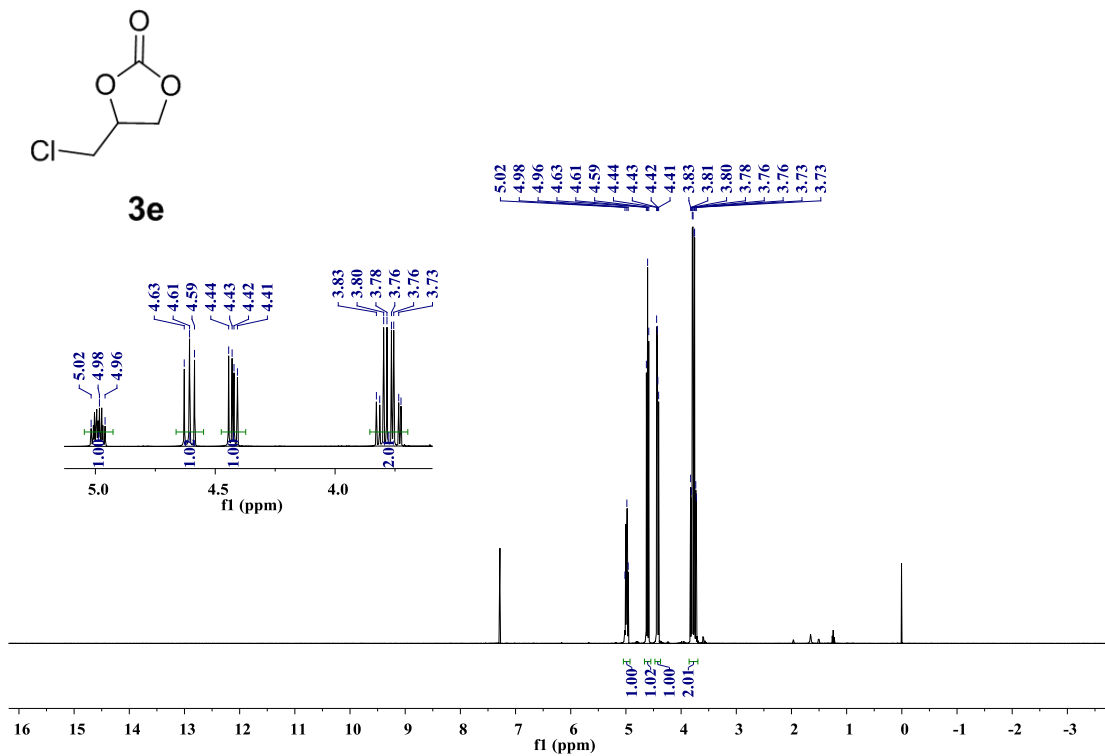

**Figure S36.** <sup>1</sup>H NMR spectra of cyclic carbonate **3e**.

cf-27

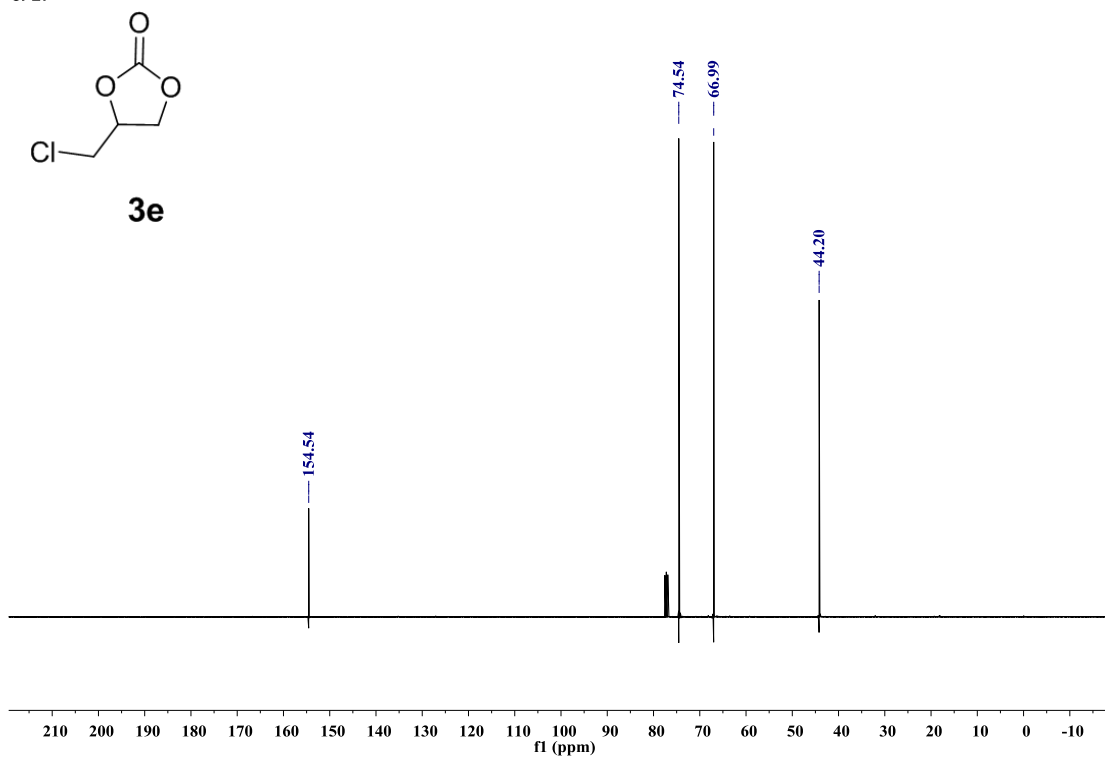

**Figure S37.** <sup>13</sup>C NMR spectra of cyclic carbonate **3e**.

cf-68

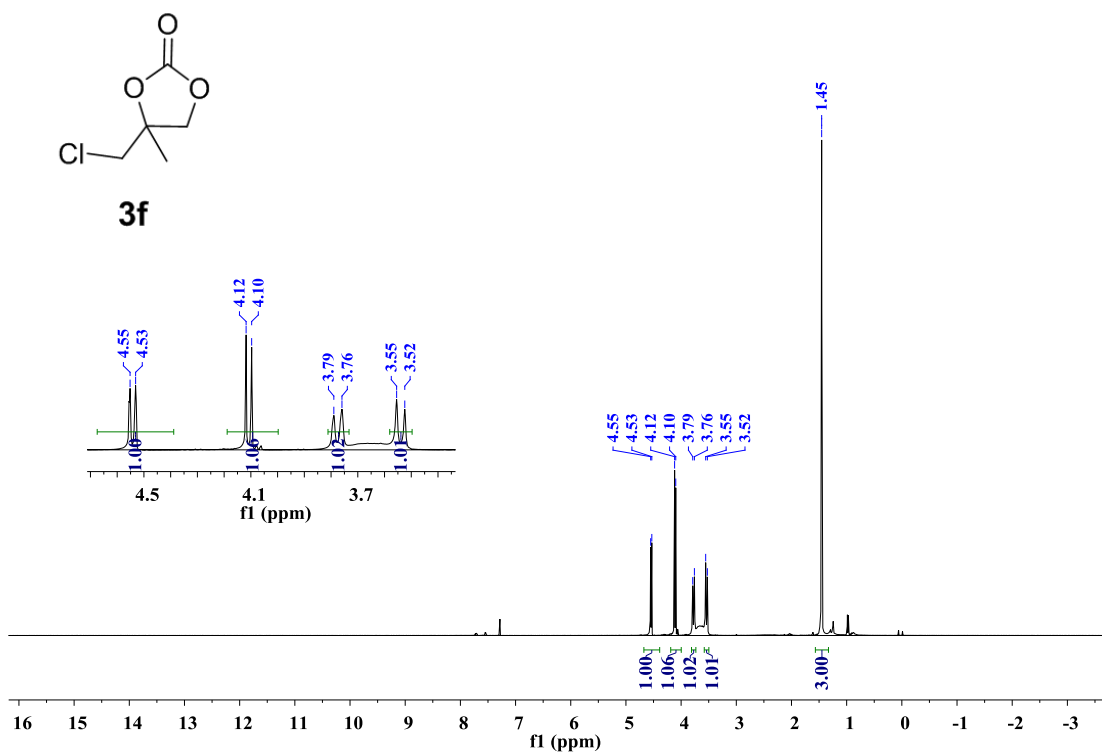

**Figure S38.** <sup>1</sup>H NMR spectra of cyclic carbonate **3f**.

cf-68

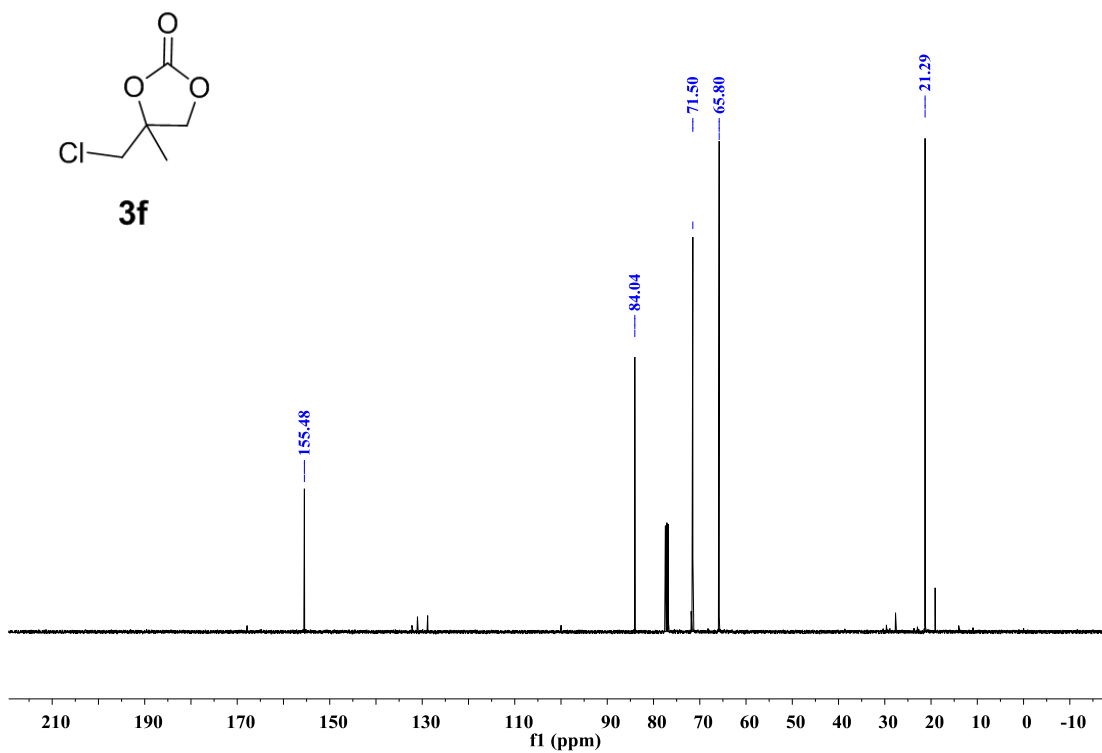

**Figure S39.** <sup>13</sup>C NMR spectra of cyclic carbonate **3f**.

cf-108

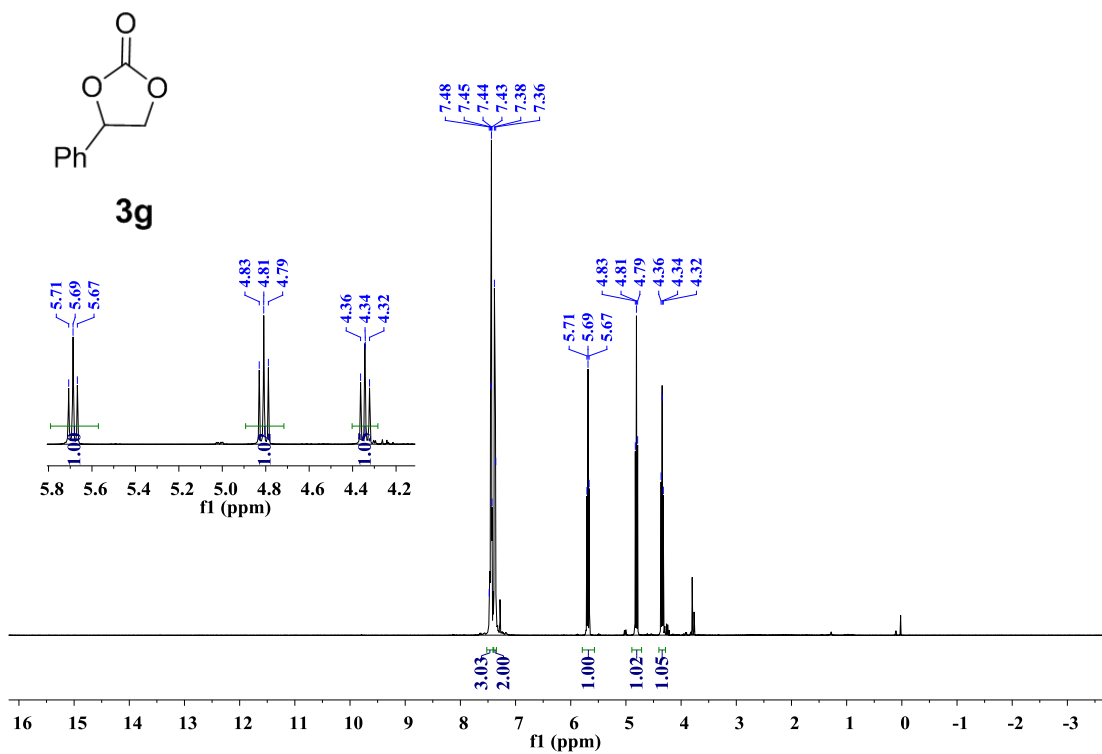

**Figure S40.** <sup>1</sup>H NMR spectra of cyclic carbonate **3g**.

cf-108

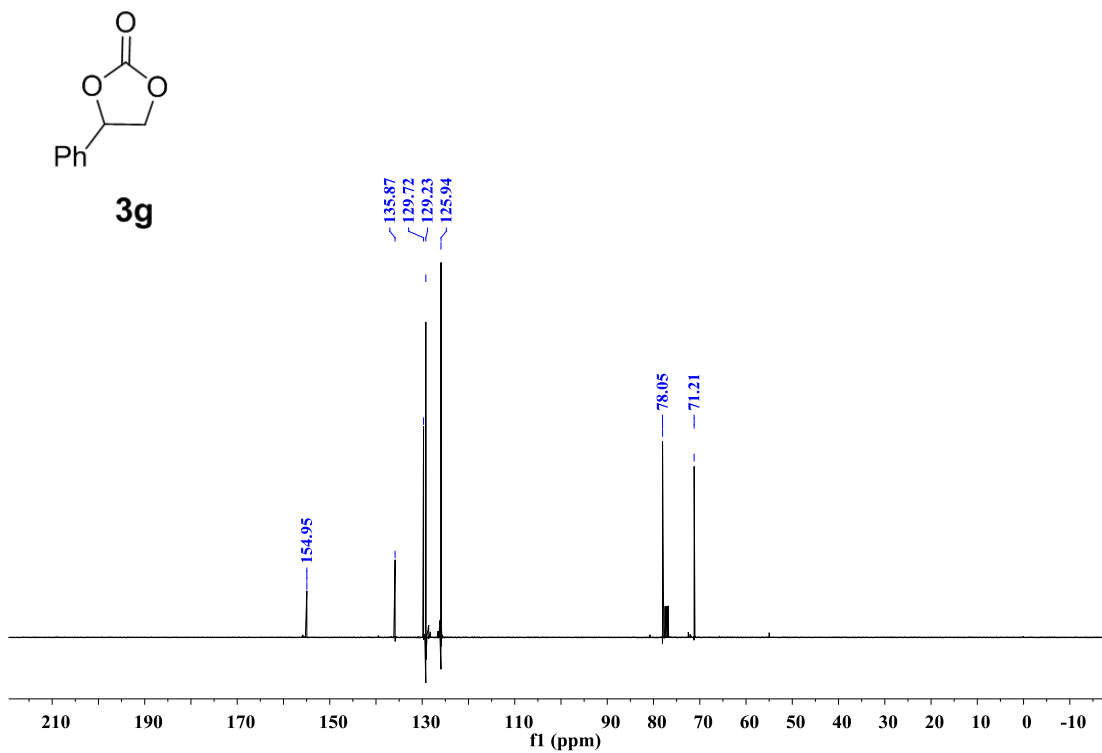

**Figure S41.** <sup>13</sup>C NMR spectra of cyclic carbonate **3g**.

cf-17

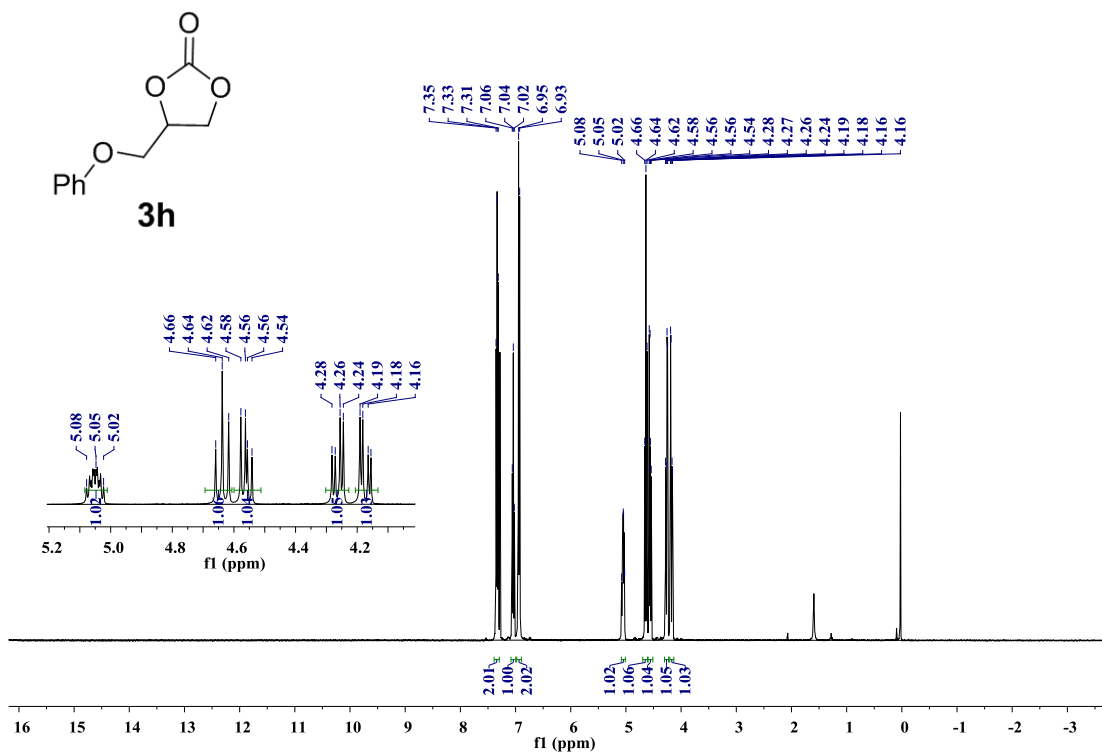Figure S42. <sup>1</sup>H NMR spectra of cyclic carbonate **3h**.

cf-17

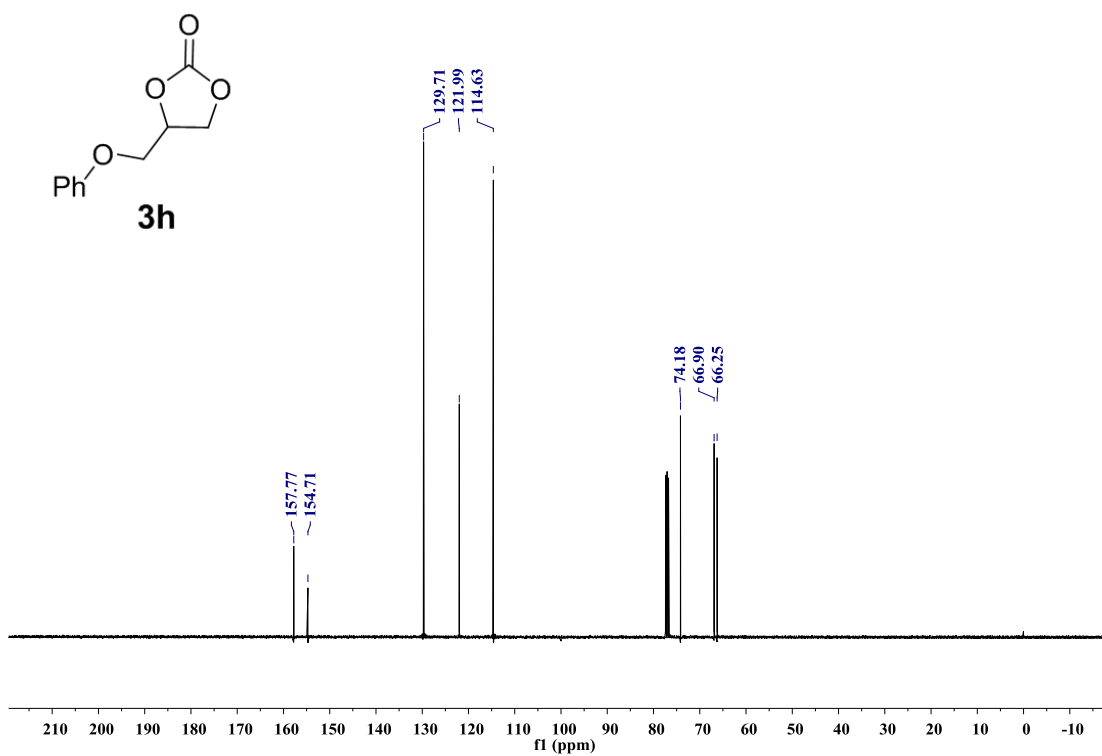Figure S43. <sup>13</sup>C NMR spectra of cyclic carbonate **3h**.



cf-99

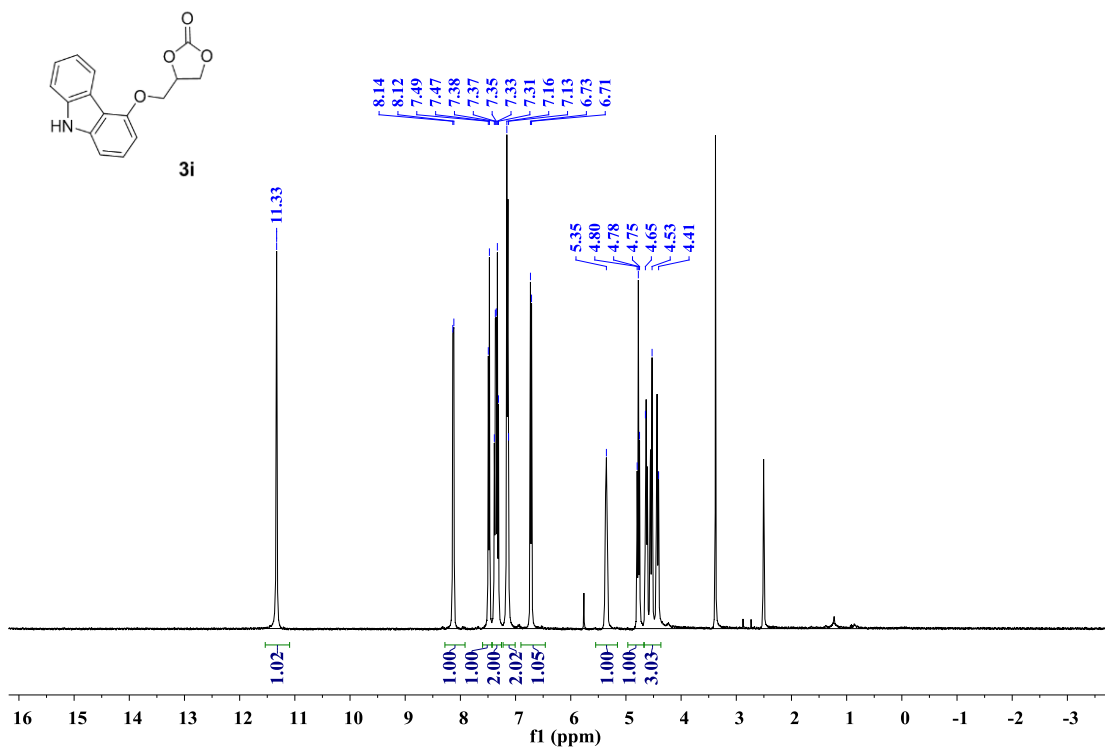

**Figure S44.** <sup>1</sup>H NMR spectra of cyclic carbonate **3i**.

cf-99

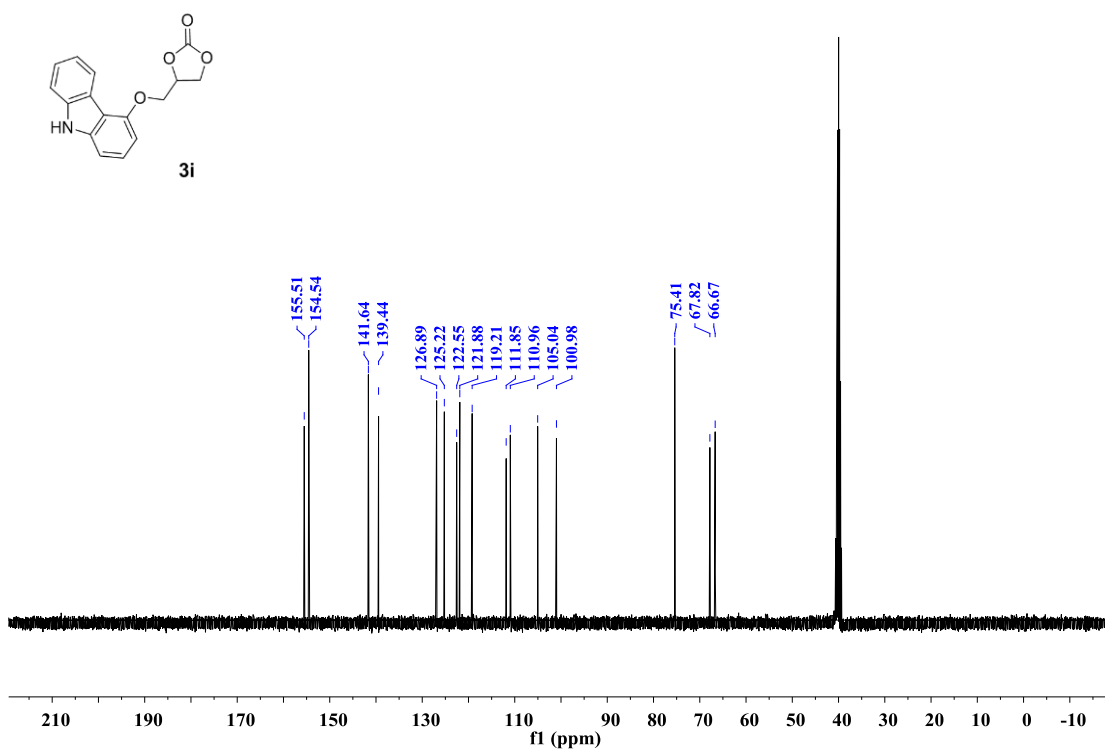

**Figure S45.** <sup>13</sup>C NMR spectra of cyclic carbonate **3i**.

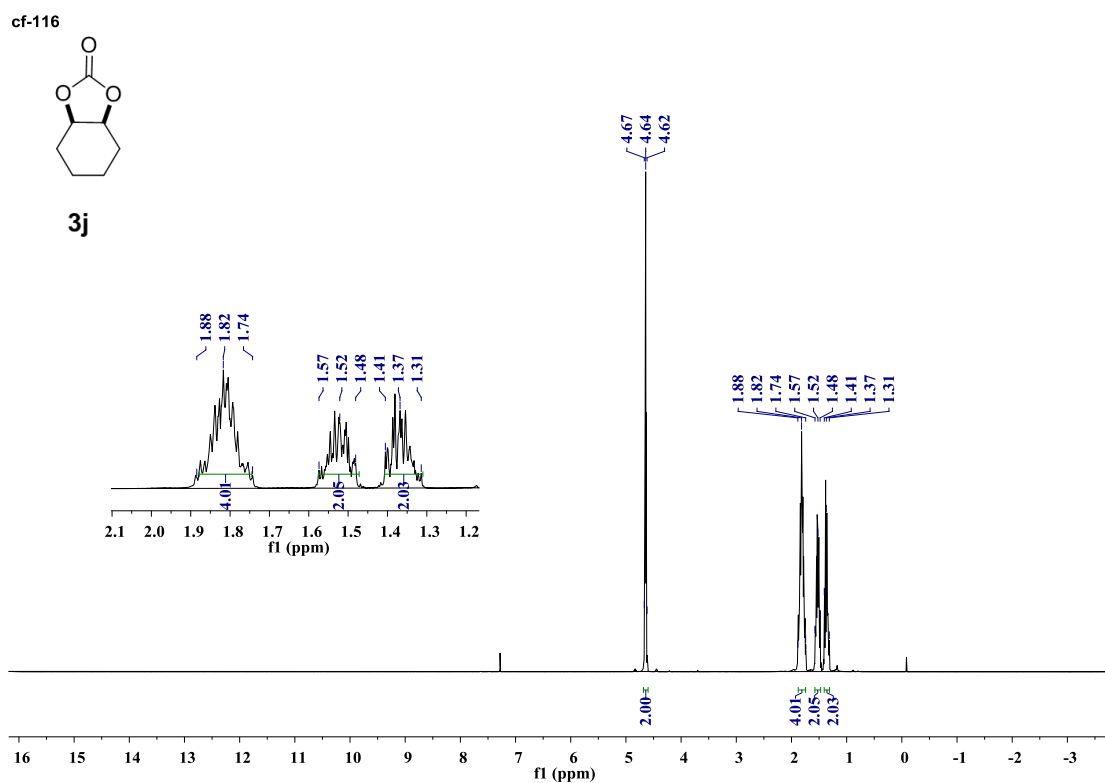

**Figure S46.** <sup>1</sup>H NMR spectra of cyclic carbonate **3j**.

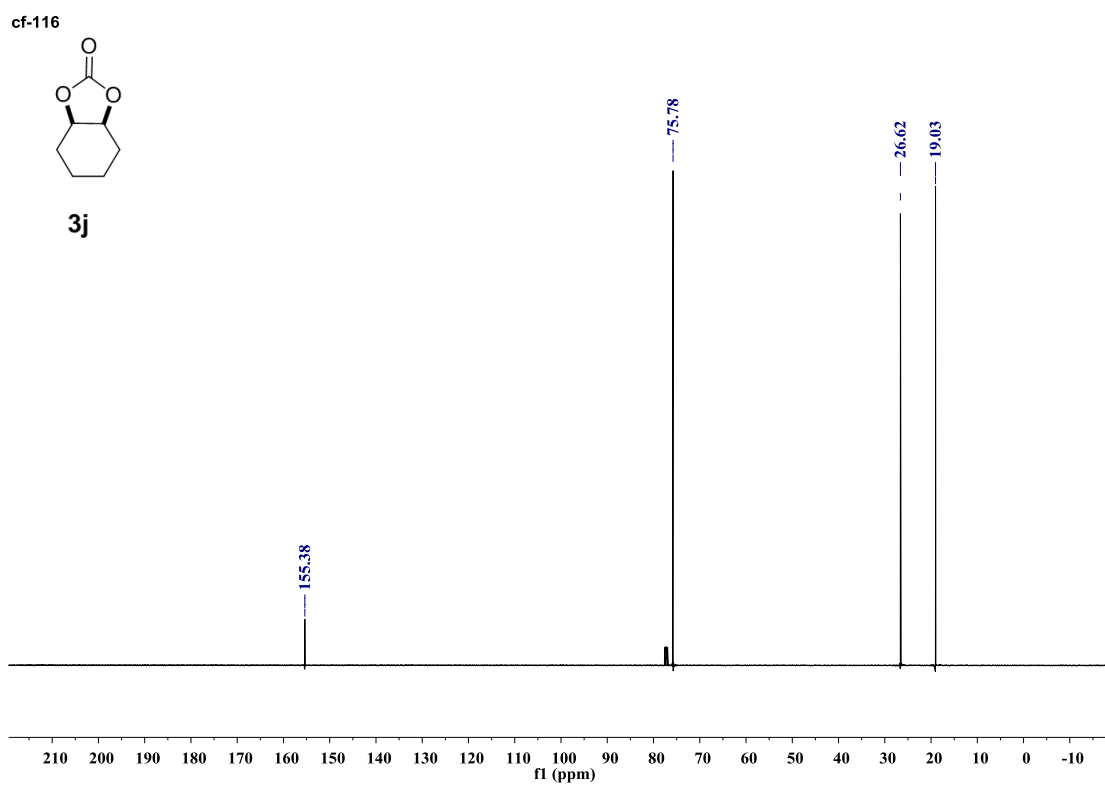

**Figure S47.** <sup>13</sup>C NMR spectra of cyclic carbonate **3j**.

cf-100

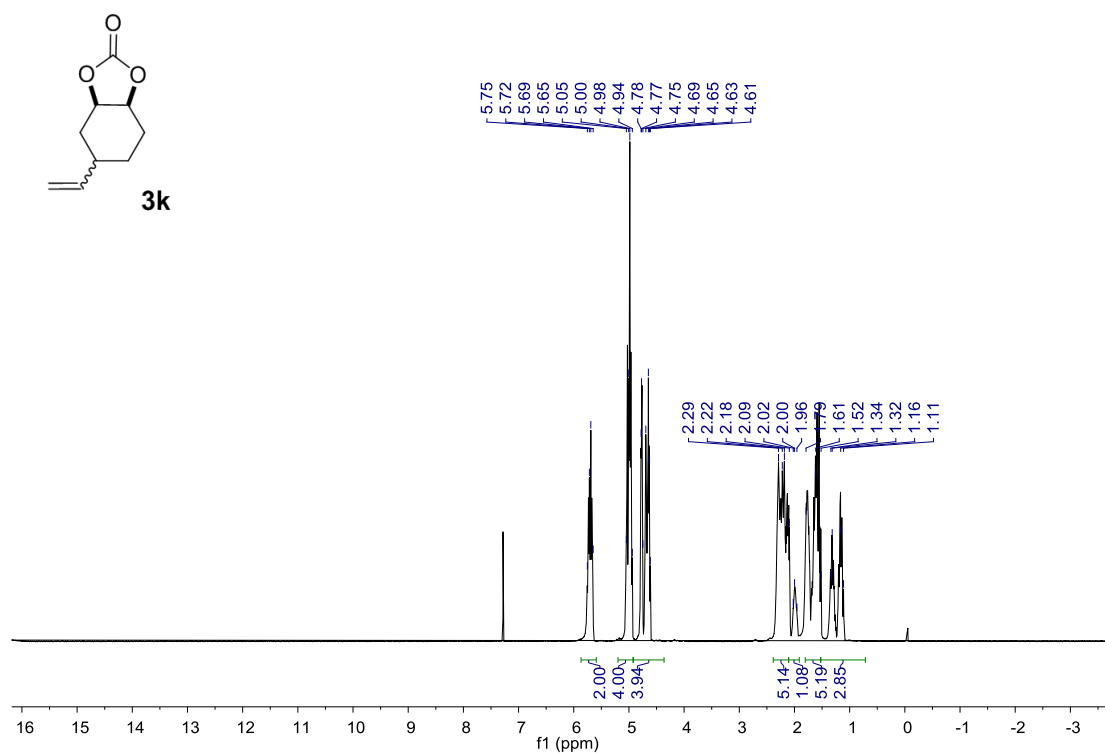

**Figure S48.** <sup>1</sup>H NMR spectra of cyclic carbonate **3k**.

cf-100

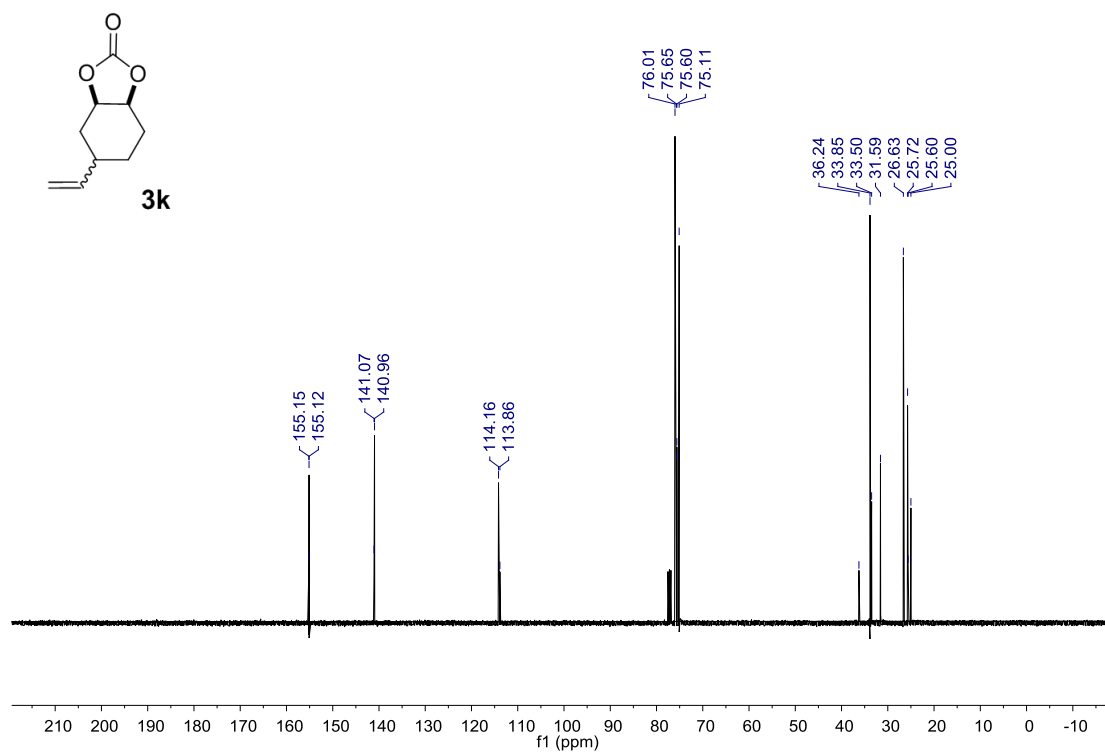

**Figure S49.** <sup>13</sup>C NMR spectra of cyclic carbonate **3k**.

cf-182

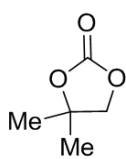**3l**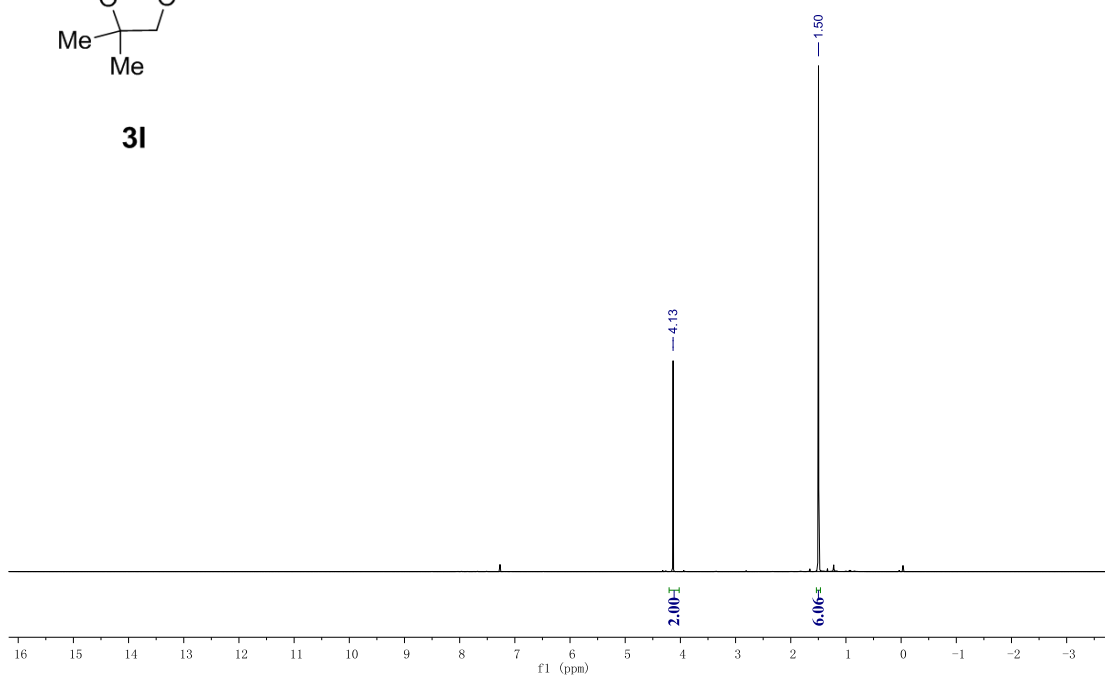**Figure S50.** <sup>1</sup>H NMR spectra of cyclic carbonate **3l**.

cf-182

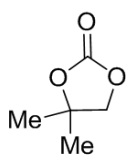**3l**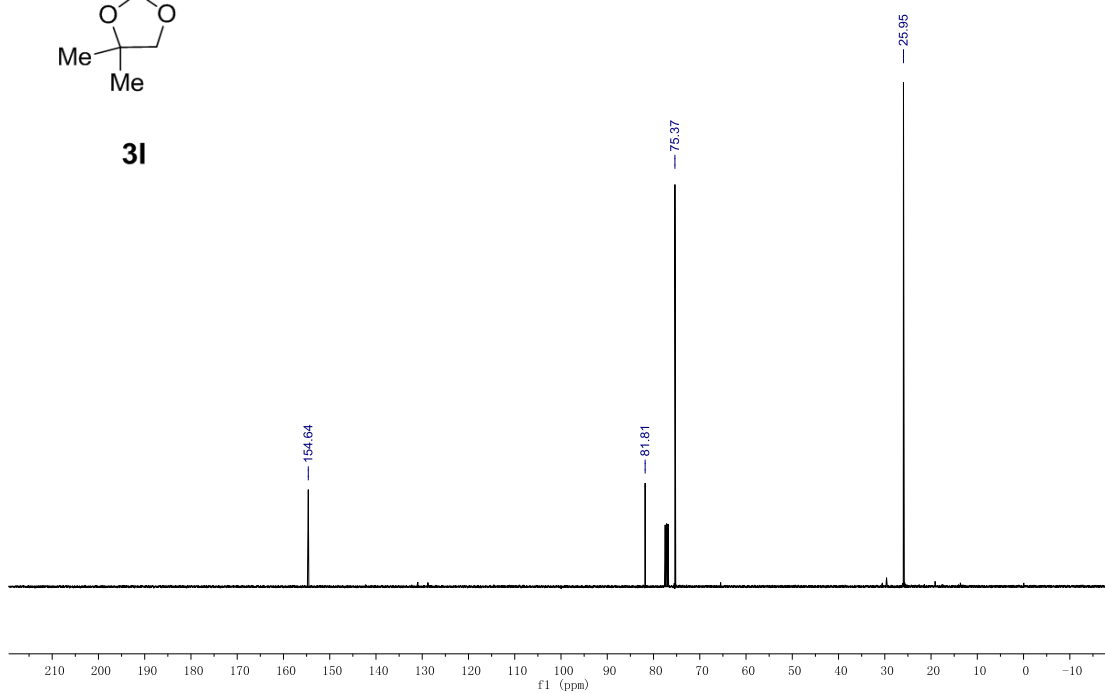**Figure S51.** <sup>13</sup>C NMR spectra of cyclic carbonate **3l**.

氢谱

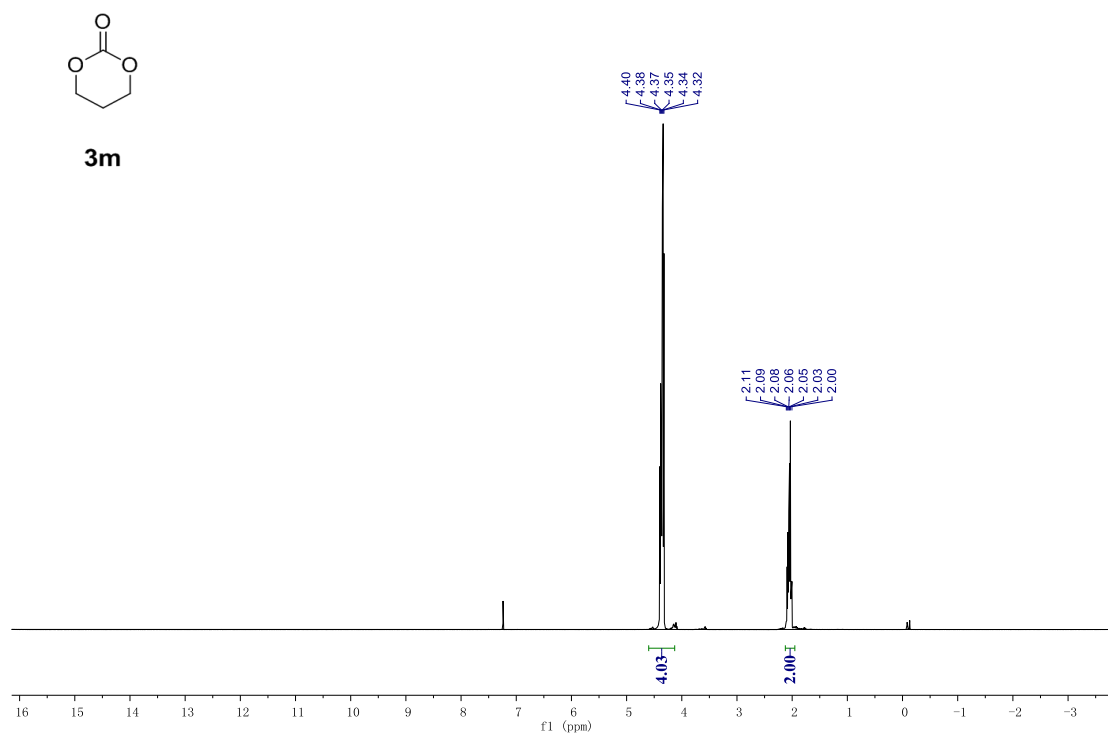

**Figure S52.**  $^1\text{H}$  NMR spectra of cyclic carbonate **3m**.

cf-196

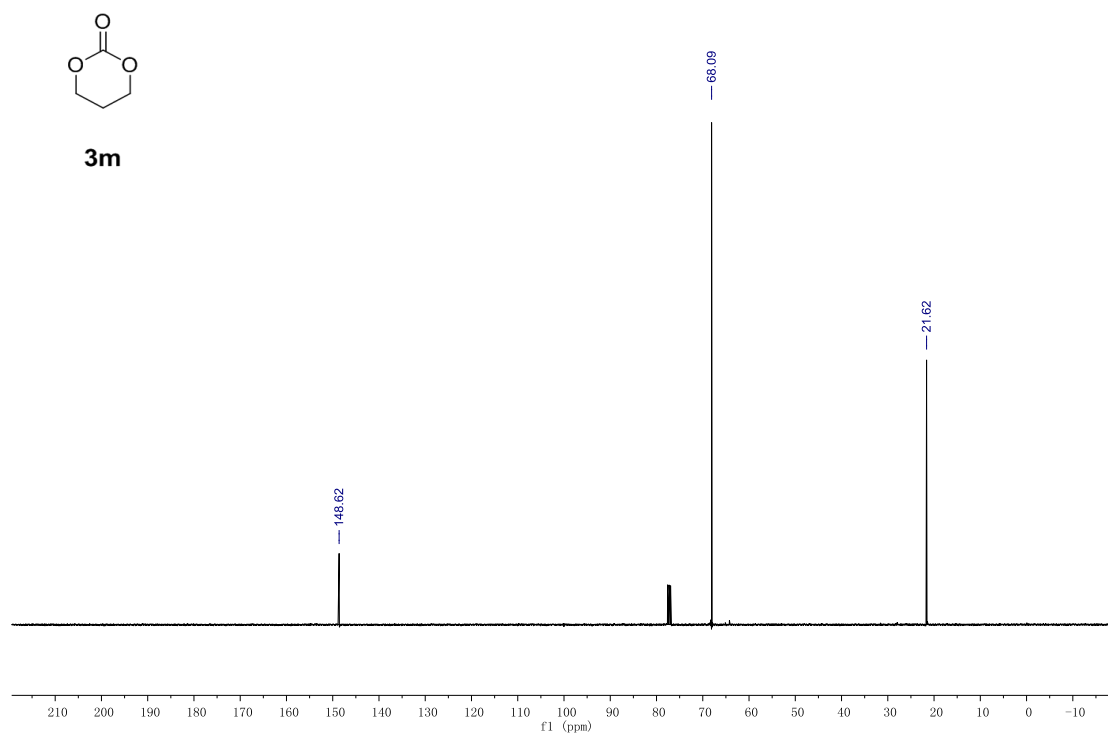

**Figure S53.**  $^{13}\text{C}$  NMR spectra of cyclic carbonate **3m**.

cf-115

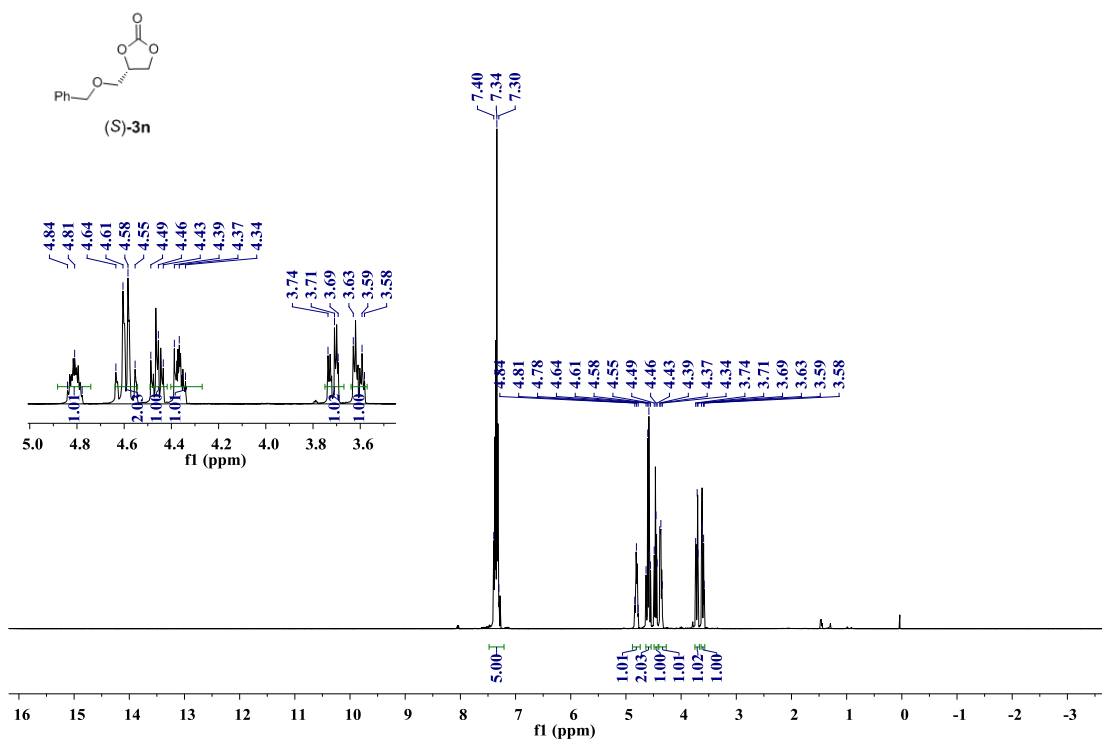Figure S54. <sup>1</sup>H NMR spectra of cyclic carbonate (*S*)-**3n**.

cf-115

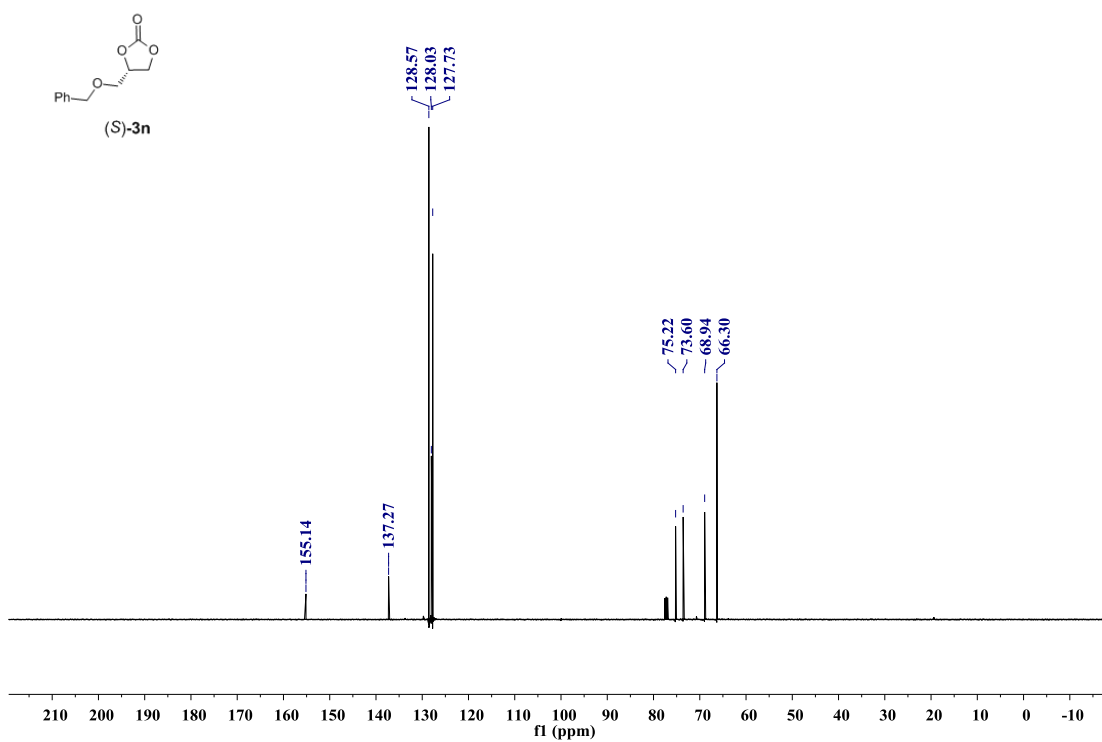Figure S55. <sup>13</sup>C NMR spectra of cyclic carbonate (*S*)-**3n**.

cf-276

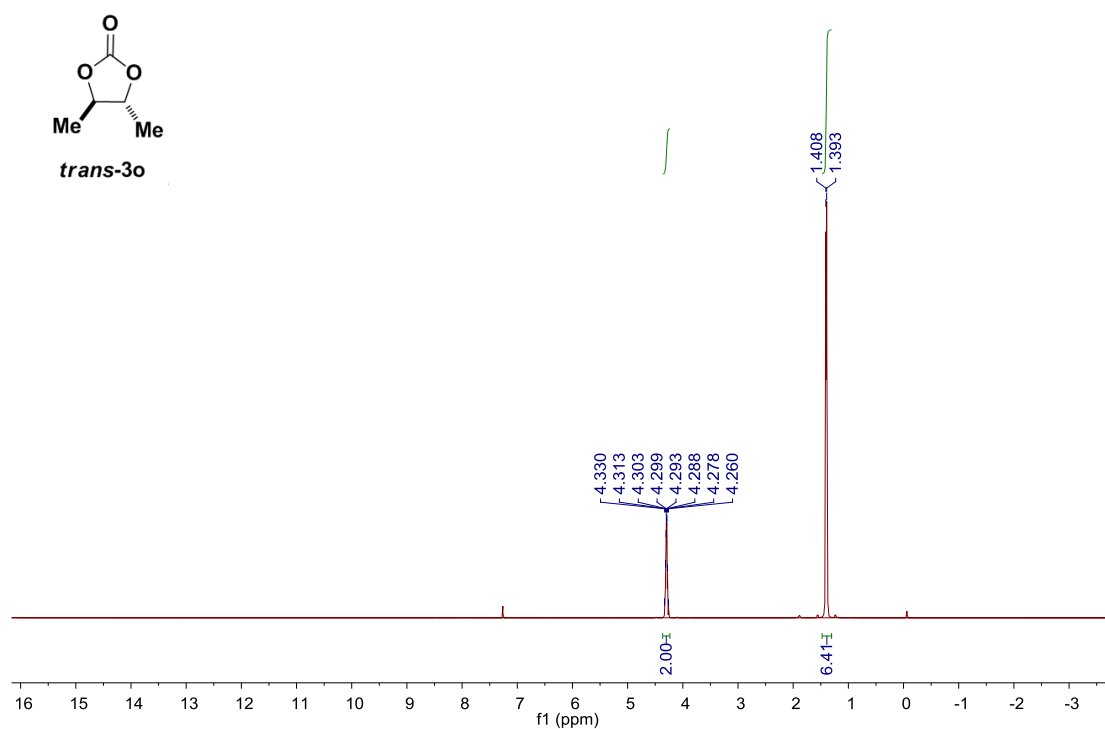

**Figure S56.**  $^1\text{H}$  NMR spectra of cyclic carbonate *trans*-**3o**.

cf-276

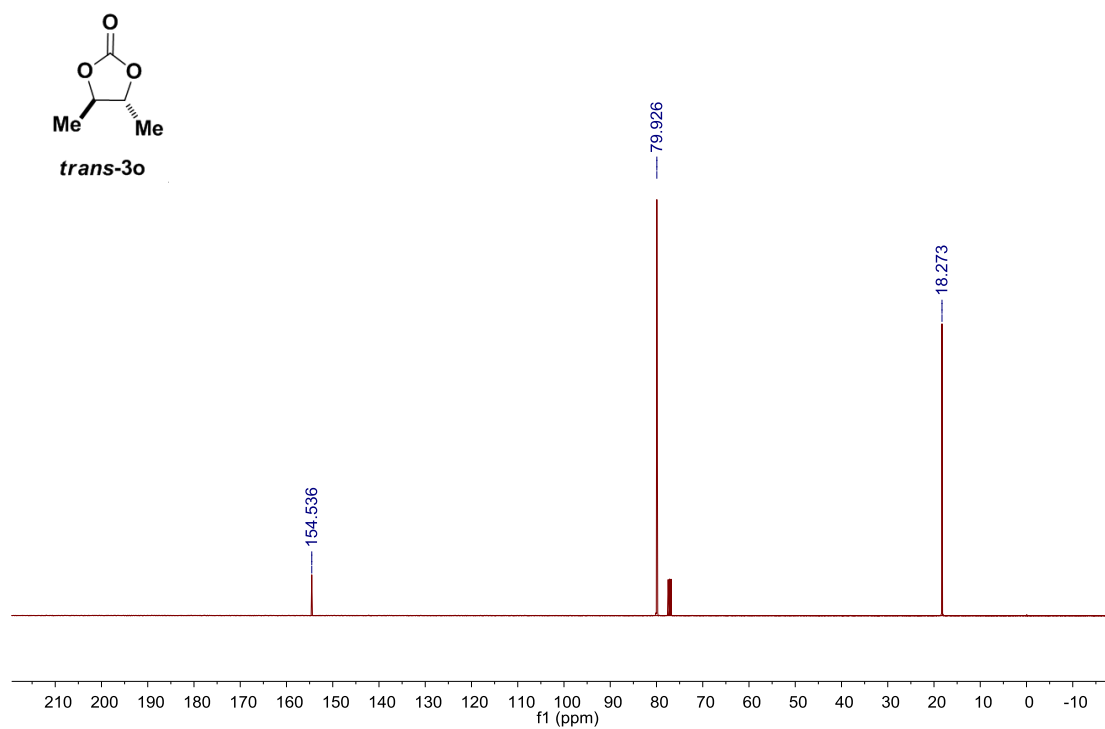

**Figure S57.**  $^{13}\text{C}$  NMR spectra of cyclic carbonate *trans*-**3o**.

cf-272

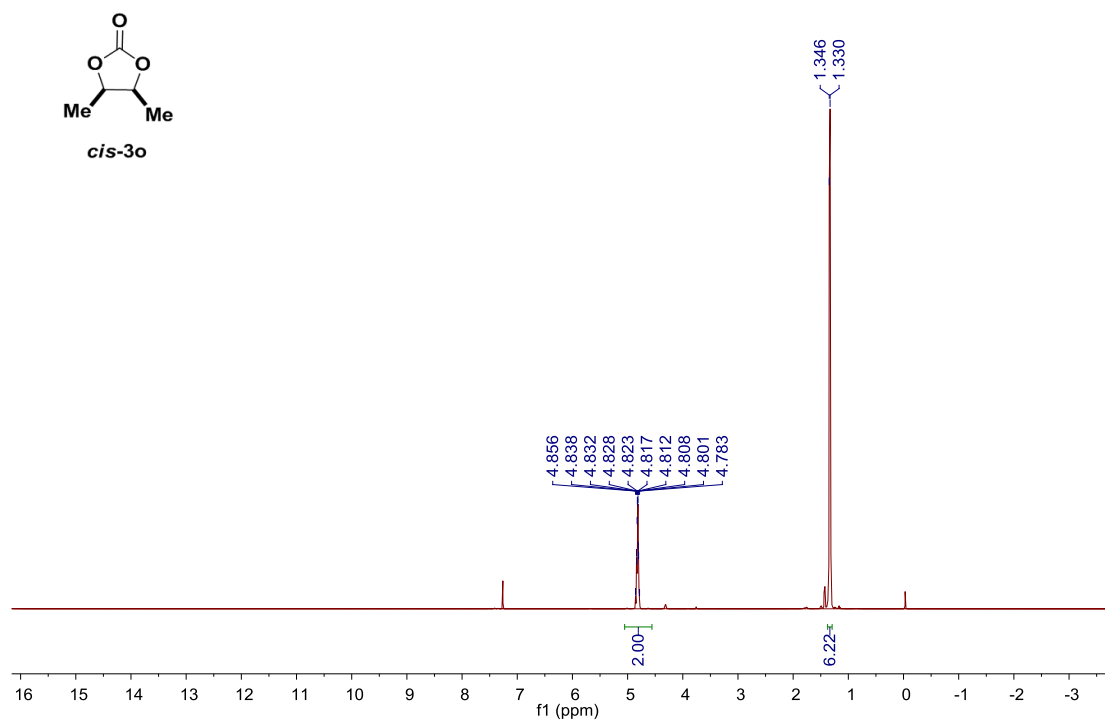

**Figure S58.**  $^1\text{H}$  NMR spectra of cyclic carbonate *cis*-**3o**.

cf-272

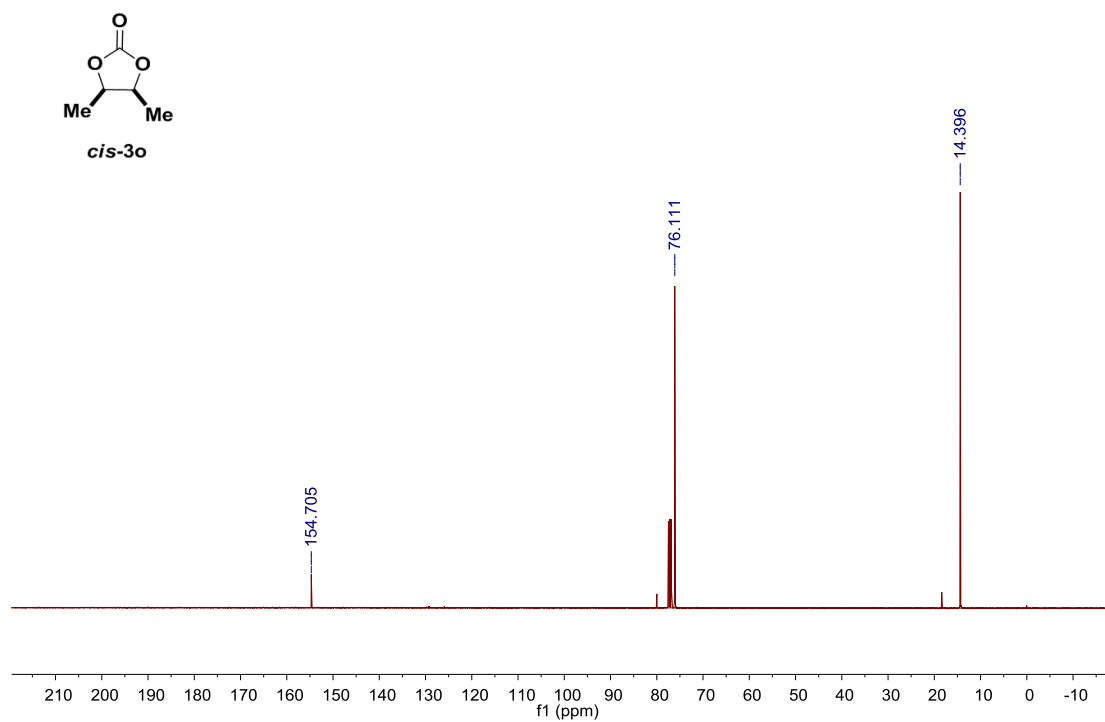

**Figure S59.**  $^{13}\text{C}$  NMR spectra of cyclic carbonate *cis*-**3o**.



**Figure S60.** HPLC spectrum of *racemic 3n-ol*.

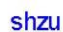

Breeze

Report Method: Untitled

Printed 6:36:54 PM 1/22/2016

Page: 1 of 1

(*S*)-4-((benzyloxy)methyl)-1,3-dioxolan-2-one: The ee of the resulting 4-((benzyloxy)methyl)-1,3-dioxolan-2-one was determined by chiral HPLC analysis of the diol derived from hydrolysis with 1M NaOH (OD-H, hexane:*i*-PrOH = 95:5,  $t_R$ (major) = 5.928 min,  $t_R$ (minor) = 8.953 min). (Reference: Ren, W. M.; Liu, Y.; Lu, X.-B. *J. Org. Chem.* **2014**, 79, 9771-9777.)

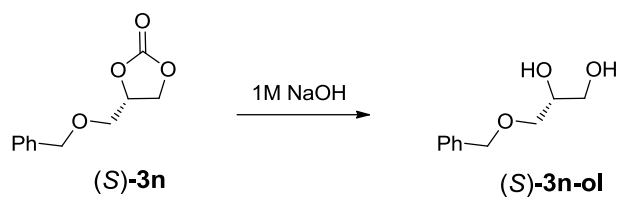

shzu

Project Name: Defaults  
Reported by User: System

Breeze

### SAMPLE INFORMATION

|                            |                                      |
|----------------------------|--------------------------------------|
| Sample Name: cf20160121-2  | Acquired By: System                  |
| Sample Type: Unknown       | Date Acquired: 1/21/2016 8:24:37 PM  |
| Vial: 1                    | Acq. Method: w y8020                 |
| Injection #: 2             | Date Processed: 1/21/2016 8:39:25 PM |
| Injection Volume: 20.00 ul | Channel Name: 2487Channel 1          |
| Run Time: 60.00 Minutes    | Sample Set Name:                     |

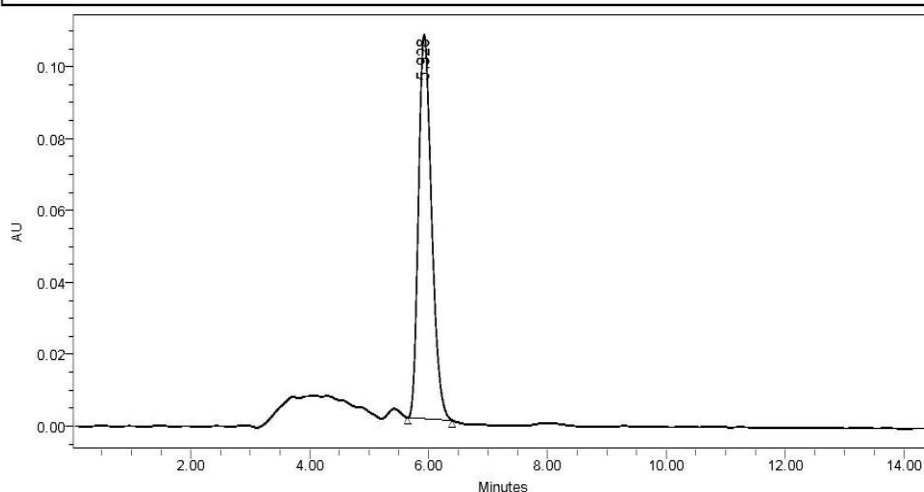

|   | RT<br>(min) | Area<br>( $\mu V \cdot sec$ ) | % Area | Height<br>( $\mu V$ ) | %<br>Height |
|---|-------------|-------------------------------|--------|-----------------------|-------------|
| 1 | 5.928       | 1641377                       | 100.00 | 107039                | 100.00      |

**Figure S61.** HPLC spectrum of (*S*)-3n-ol.

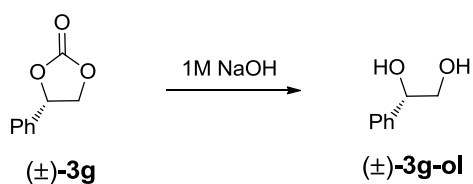

XJTIPC

Project Name Lu

Reported by User: Breeze user (Breeze)

Breeze<sup>2</sup>  
HPLC System

# SAMPLE INFORMATION

|                   |                |                 |                          |
|-------------------|----------------|-----------------|--------------------------|
| Sample Name:      | CF-108         | Acquired By:    | Breeze                   |
| Sample Type:      | Unknown        | Date Acquired:  | 9/11/2017 1:47:41 AM CST |
| Vial:             | 999            | Acq. Method:    | 20170816955254           |
| Injection #:      | 1              | Date Processed: | 9/11/2017 5:11:38 AM CST |
| Injection Volume: | 10.00 ul       | Channel Name:   | W2489 ChA                |
| Run Time:         | 100.00 Minutes | Sample Set Name |                          |

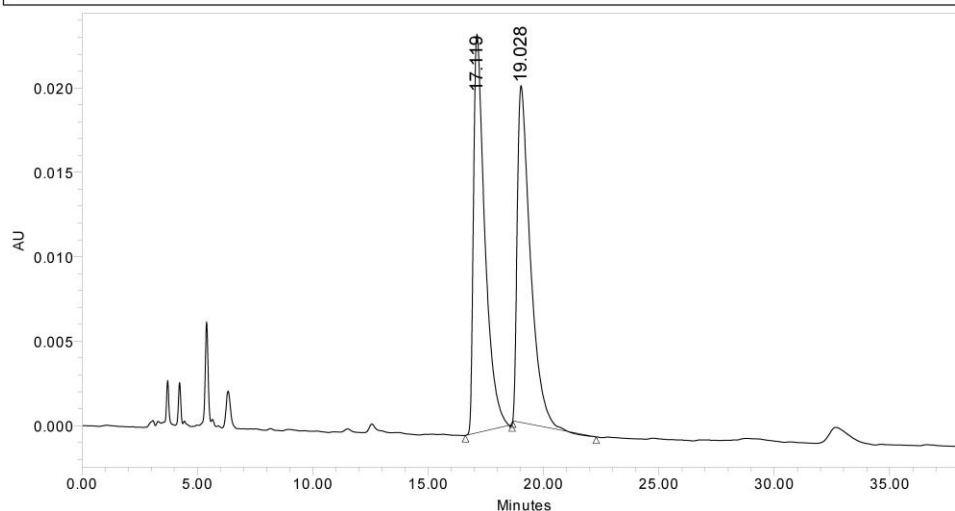

|   | RT<br>(min) | Area<br>( $\mu\text{V}\cdot\text{sec}$ ) | % Area | Height<br>( $\mu\text{V}$ ) | % Height |
|---|-------------|------------------------------------------|--------|-----------------------------|----------|
| 1 | 17.119      | 810275                                   | 50.55  | 23598                       | 54.19    |
| 2 | 19.028      | 792764                                   | 49.45  | 19949                       | 45.81    |

Report Method: Untitled  
Page: 1 of 1

Printed: 9/11/2017  
5:20:16 AM PRC

**Figure S62.** HPLC spectrum of *racemic 3g-ol*.

**(S)-3-phenoxy-1,2-propylene carbonate:** The ee of the resulting phenyl(ethylene carbonate) was determined by chiral HPLC analysis of the diol derived from hydrolysis with 1M NaOH (OD-H, hexane:*i*-PrOH = 95:5,  $t_R(\text{major}) = 18.167 \text{ min}$ ,  $t_R(\text{minor}) = 16.739 \text{ min}$ ).

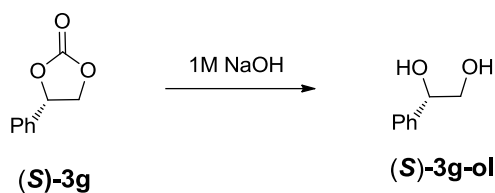

XJTIPC

Project Name Lu

Reported by User: Breeze user (Breeze)

**Breeze<sup>2</sup>**  
HPLC System

### SAMPLE INFORMATION

|                            |                                          |
|----------------------------|------------------------------------------|
| Sample Name: 279-3         | Acquired By: Breeze                      |
| Sample Type: Unknown       | Date Acquired: 9/11/2017 4:05:30 AM CST  |
| Vial: 1                    | Acq. Method: 20170816955254              |
| Injection #: 1             | Date Processed: 9/11/2017 5:24:51 AM CST |
| Injection Volume: 10.00 ul | Channel Name: W2489 ChA                  |
| Run Time: 100.00 Minutes   | Sample Set Name                          |

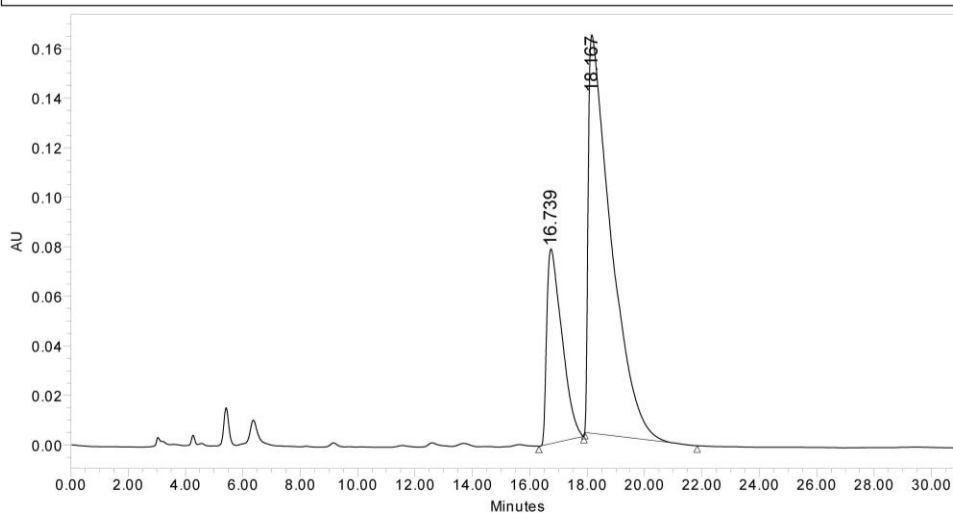

|   | RT<br>(min) | Area<br>( $\mu\text{V}\cdot\text{sec}$ ) | % Area | Height<br>( $\mu\text{V}$ ) | % Height |
|---|-------------|------------------------------------------|--------|-----------------------------|----------|
| 1 | 16.739      | 2884345                                  | 24.67  | 78514                       | 32.82    |
| 2 | 18.167      | 8809682                                  | 75.33  | 160698                      | 67.18    |

Report Method: Untitled  
Page: 1 of 1

Printed: 9/11/2017  
5:25:45 AM PRC

**Figure S63.** HPLC spectrum of (S)-3g-ol.

**(R)-3-phenoxy-1,2-propylene carbonate:** The ee of the resulting phenyl(ethylene carbonate) was determined by chiral HPLC analysis of the diol derived from hydrolysis with 1M NaOH (OD-H, hexane:*i*-PrOH = 95:5,  $t_R(\text{major}) = 18.426 \text{ min}$ ,  $t_R(\text{minor}) = 15.982 \text{ min}$ ).

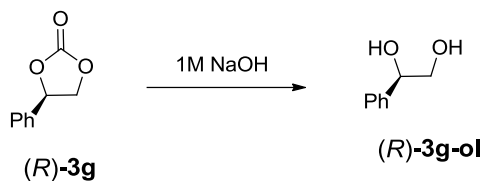

XJTIPC

Project Name Lu

Reported by User: Breeze user (Breeze)

Breeze<sup>2</sup>  
HPLC System

### SAMPLE INFORMATION

|                                       |                                          |
|---------------------------------------|------------------------------------------|
| Sample Name: CF-278                   | Acquired By: Breeze                      |
| Sample Type: Unknown                  | Date Acquired: 9/11/2017 4:38:14 AM CST  |
| Vial: 2                               | Acq. Method: 20170816955254              |
| Injection #: 1                        | Date Processed: 9/11/2017 5:27:21 AM CST |
| Injection Volume: 10.00 $\mu\text{l}$ | Channel Name: W2489 ChA                  |
| Run Time: 100.00 Minutes              | Sample Set Name                          |

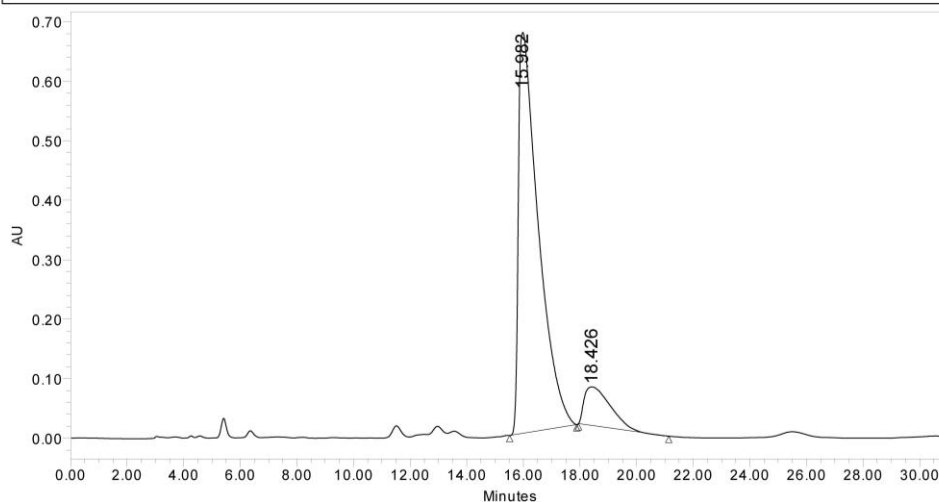

|   | RT<br>(min) | Area<br>( $\mu\text{V}\cdot\text{sec}$ ) | % Area | Height<br>( $\mu\text{V}$ ) | % Height |
|---|-------------|------------------------------------------|--------|-----------------------------|----------|
| 1 | 15.982      | 32988908                                 | 88.73  | 673825                      | 91.24    |
| 2 | 18.426      | 4191791                                  | 11.27  | 64686                       | 8.76     |

Report Method: Untitled

Page: 1 of 1

Printed: 9/11/2017

5:28:11 AM PRC

**Figure S64.** HPLC spectrum of (R)-3g-o.
